# Supplementary material
Source: publisher site journal article supplement (https://www.dovepress.com/article/334171)
Supplement: Supplementary file 1 [file get_supplementary_file.php]

**Table S1: Clinical information of patients with IFN-a 2b treatment**

| **Number** | **Gender** | **Age (years)** | **Treatment before IFN-a 2b** | **Time from diagnosis to IFN-a 2b (months)** | **Duration of IFN-a 2b (months)** | **Adverse Event** | **Effect Evaluation** | **Treatment after IFN-a 2b** | **Follow-up of Tumor Status after the cease of IFN-a 2b** | **Time of Progression Free Survival（months）** | **Current Patient Status** | **Time of Overall Survival（months）** |
| --- | --- | --- | --- | --- | --- | --- | --- | --- | --- | --- | --- | --- |
| 1 | Female | 36 | Transarterial Embolization | 6 | 18 | Fever Grade 1 / Fatigue Grade1 | Complete Response | Observation | Stable | 76 | Alive | 76 |
| 2 | Male | 22 | Chemotherapy | 33 | 20 | None | Complete Response | Observation | Stable | 71 | Alive | 71 |
| 3 | Male | 22 | None | 3 | 31 | Fever Grade 1 | Partial Response | Observation | Stable | 57 | Alive | 57 |
| 4 | Male | 24 | None | 3 | 24 | None | Partial Response | Observation | Stable | 64 | Alive | 64 |
| 5 | Male | 21 | Surgery | 51 | 8 | Fever Grade 1 | Partial Response | Observation | Stable | 28 | Alive | 28 |
| 6 | Male | 36 | None | 42 | 15 | Fever Grade 1 | Partial Response | Observation | Progression, 36 months after the cease of IFN-a 2b | 51 | Alive | 64 |
| 7 | Female | 56 | Radiofrequency Ablation | 4 | 16 | None | Partial Response | Treatment Continued | / | 16 | Alive | 16 |
| 8 | Male | 43 | Radiofrequency Ablation | 21 | 30 | None | Partial Response | Observation | Stable | 73 | Alive | 73 |
| 9 | Female | 32 | Radiofrequency Ablation | 8 | 39 | Fever Grade 1 | Partial Response | Treatment Continued | / | 39 | Alive | 39 |
| 10 | Female | 35 | None | 9 | 26 | Fever Grade 1 / Fatigue Grade1 | Partial Response | Observation | Stable | 32 | Alive | 32 |
| 11 | Male | 33 | Surgery | 42 | 15 | None | Partial Response | Treatment Continued | / | 15 | Alive | 15 |
| 12 | Male | 31 | None | 5 | 30 | Thrombopenia Grade 1 / Leukopenia Grade 1 | Partial Response | Observation | Stable | 38 | Alive | 38 |
| 13 | Male | 31 | None | 3 | 48 | Fever Grade 1 | Partial Response | Observation | Stable | 52 | Alive | 52 |
| 14 | Female | 54 | Radiofrequency Ablation | 3 | 33 | None | Partial Response | Observation | Stable | 39 | Alive | 39 |
| 15 | Female | 41 | Transarterial Embolization | 14 | 48 | Fever Grade 1 / Fatigue Grade1 | Partial Response | Observation | Stable | 66 | Alive | 66 |
| 16 | Female | 30 | None | 8 | 6 | Hypothyroidism Grade 2 | Partial Response | Treatment Continued | / | 6 | Alive | 6 |
| 17 | Female | 42 | None | 16 | 36 | Fatigue Grade 1 / Anemia Grade 1 | Partial Response | Observation | Stable | 41 | Alive | 41 |
| 18 | Male | 53 | None | 57 | 15 | None | Partial Response | Treatment Continued | / | 15 | Alive | 15 |
| 19 | Male | 32 | None | 3 | 19 | Fever Grade 1 / Decreased appetite Grade 1 | Partial Response | Observation | Stable | 40 | Alive | 40 |
| 20 | Female | 34 | Chemotherapy | 11 | 24 | Fever Grade 1 | Partial Response | Observation | Stable | 74 | Alive | 74 |
| 21 | Male | 26 | None | 9 | 19 | Fever Grade 1 / Fatigue Grade1 | Partial Response | Observation | Stable | 33 | Alive | 33 |
| 22 | Male | 22 | None | 3 | 26 | None | Partial Response | Treatment Continued | / | 26 | Alive | 26 |
| 23 | Female | 37 | None | 3 | 28 | Alopecia Grade1 | Stable disease | Treatment Continued | / | 28 | Alive | 28 |
| 24 | Female | 27 | None | 8 | 16 | Fever Grade 1 / Fatigue Grade1 | Stable disease | Observation | Stable | 52 | Alive | 52 |
| 25 | Female | 40 | None | 3 | 33 | Fever Grade 1 | Stable disease | Treatment Continued | / | 33 | Alive | 33 |
| 26 | Male | 22 | Chemotherapy | 25 | 14 | Leukopenia Grade 2 / Thrombopenia Grade 2 | Stable disease | Treatment Continued | / | 14 | Alive | 14 |
| 27 | Female | 41 | Radiofrequency Ablation | 54 | 8 | None | Stable disease | Treatment Continued | / | 8 | Alive | 8 |
| 28 | Female | 41 | None | 4 | 8 | None | Stable disease | Treatment Continued | / | 8 | Alive | 8 |
| 29 | Male | 30 | None | 13 | 13 | Fatigue Grade1 | Stable disease | Observation | Progression, 12 months after the cease of IFN-a 2b | 25 | Alive | 32 |
| 30 | Female | 30 | None | 45 | 15 | Alopecia Grade1 / Rash Grade1 | Stable disease | Treatment Continued | / | 15 | Alive | 15 |
| 31 | Female | 50 | None | 3 | 13 | Fever Grade 1 | Stable disease | Treatment Continued | / | 13 | Alive | 13 |
| 32 | Male | 43 | None | 24 | 27 | Fever Grade 1 | Stable disease | Observation | Stable | 35 | Alive | 35 |
| 33 | Male | 52 | None | 6 | 24 | Fever Grade 1 / Fatigue Grade1 | Stable disease | Observation | Progression, 10 months after the cease of IFN-a 2b | 33 | Alive | 42 |
| 34 | Female | 42 | Radiofrequency Ablation | 24 | 24 | Fever Grade 1 | Stable disease | Observation | Progression, 12 months after the cease of IFN-a 2b | 36 | Alive | 60 |
| 35 | Male | 32 | None | 15 | 9 | Fever Grade 1 | Progressed disease | Observation | Progression | 6 | Alive | 45 |
| 36 | Female | 18 | None | 2 | 6 | Fever Grade 1 | Progressed disease | Treatmment of Apatinib | Stable | 6 | Alive | 10 |
| 37 | Male | 44 | None | 10 | 10 | Fever Grade 1 / Fatigue Grade1 | Progressed disease | Observation | Progression | 6 | Alive | 36 |
| 38 | Male | 30 | Transarterial Embolization | 12 | 6 | Fever Grade 1 | Progressed disease | Observation | Progression | 6 | Dead | 14 |
| 39 | Male | 48 | Surgery | 16 | 16 | None | Progressed disease | Observation | Progression | 5 | Alive | 16 |
| 40 | Female | 59 | Radiofrequency Ablation | 15 | 8 | None | Progressed disease | Treatmment of Apatinib | Progression | 6 | Alive | 17 |
| 41 | Female | 46 | None | 5 | 20 | None | Progressed disease | Treatmment of Apatinib | Not available | 4 | Alive | 20 |
| 42 | Male | 65 | Radiofrequency Ablation | 4 | 3 | Rash Grade 1 / Hypothyroidism Grade 2 | Progressed disease | Treatmment of Apatinib | Progression | 3 | Alive | 3 |

**Fig S1: Radiological comparison before and after the treatment of IFN-a 2b**

(Patients’ numbers were consistent with Table S1)

| Baseline | Best changes |
| --- | --- |
| 1# Complete Response | |
| 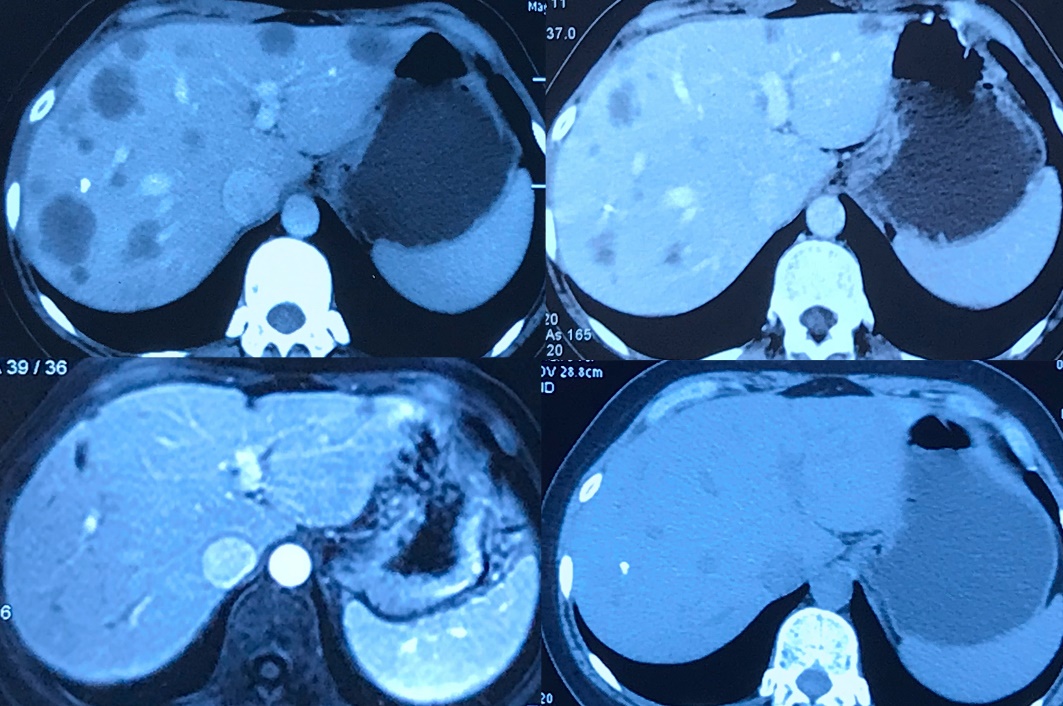 | 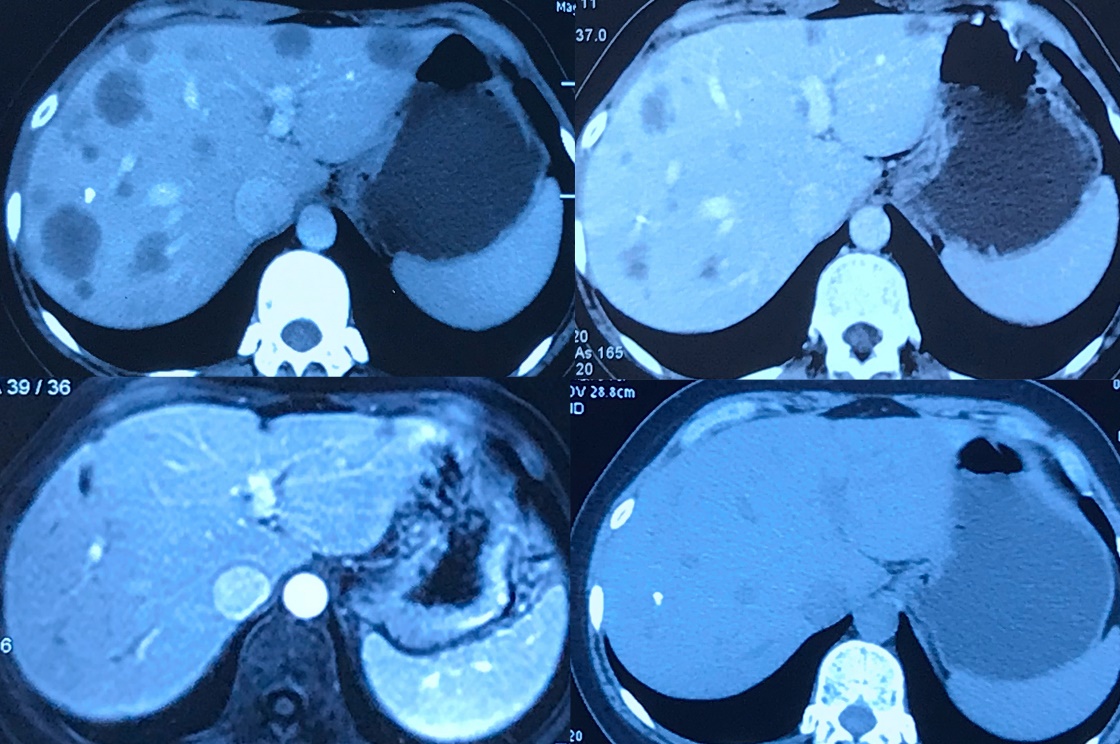 |
| 2# Complete Response | |
| 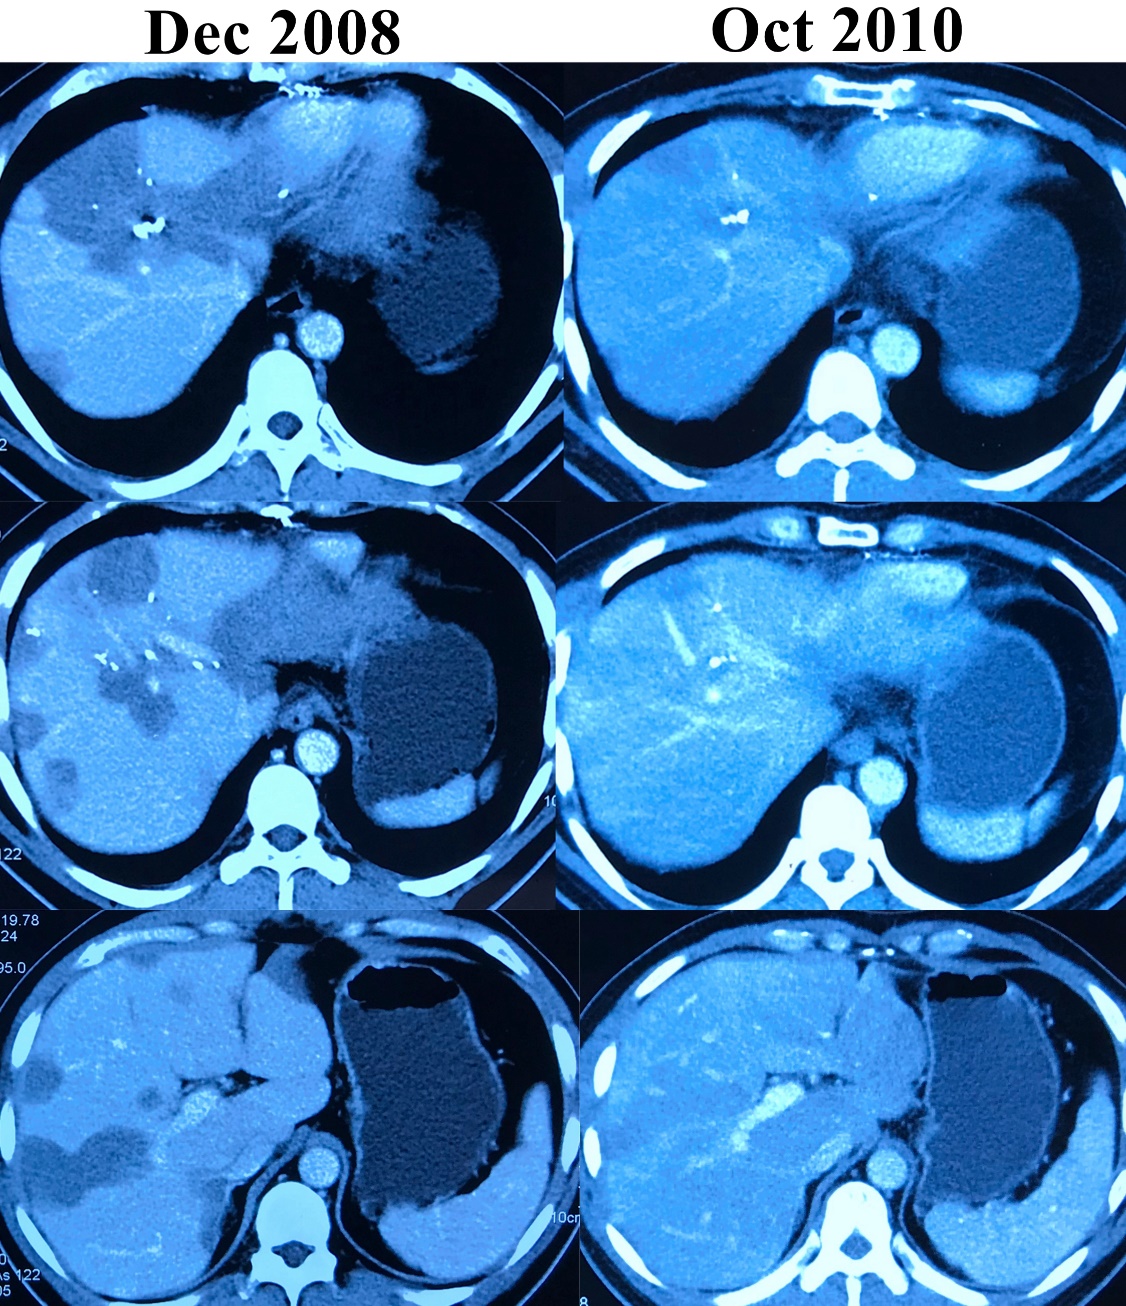 | 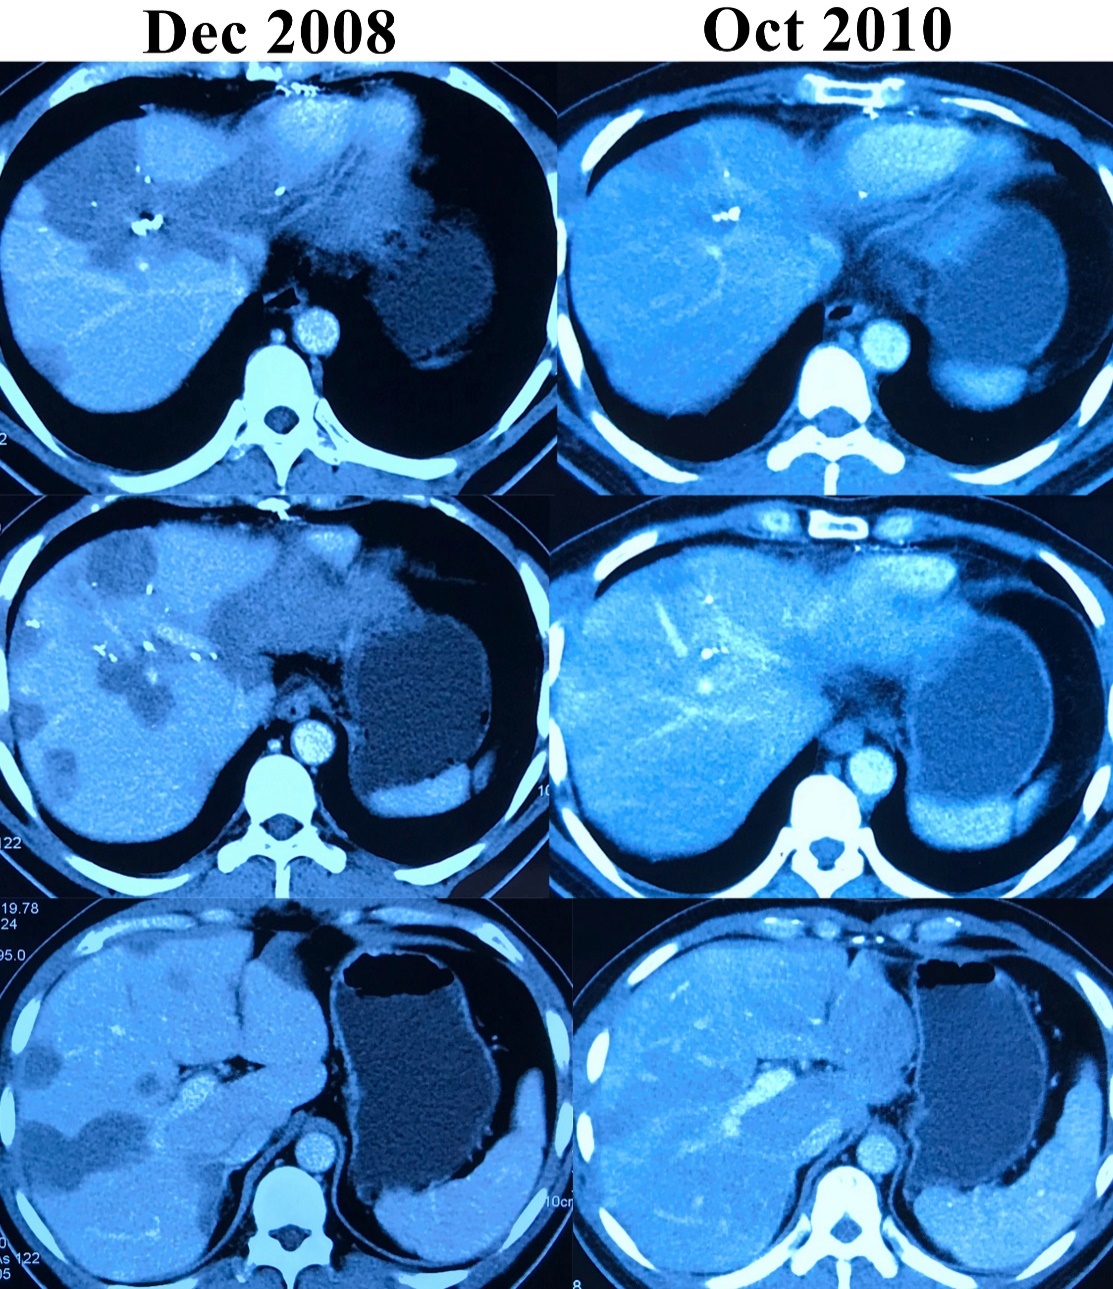 |
| 3# Partial Response | |
| 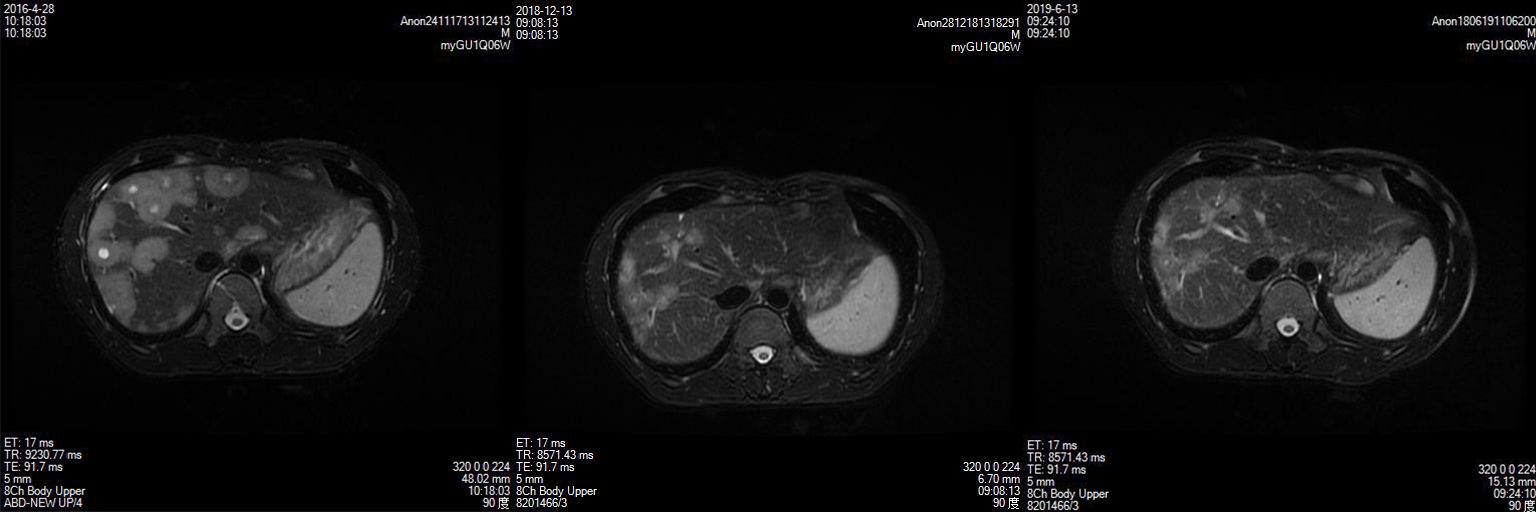 | 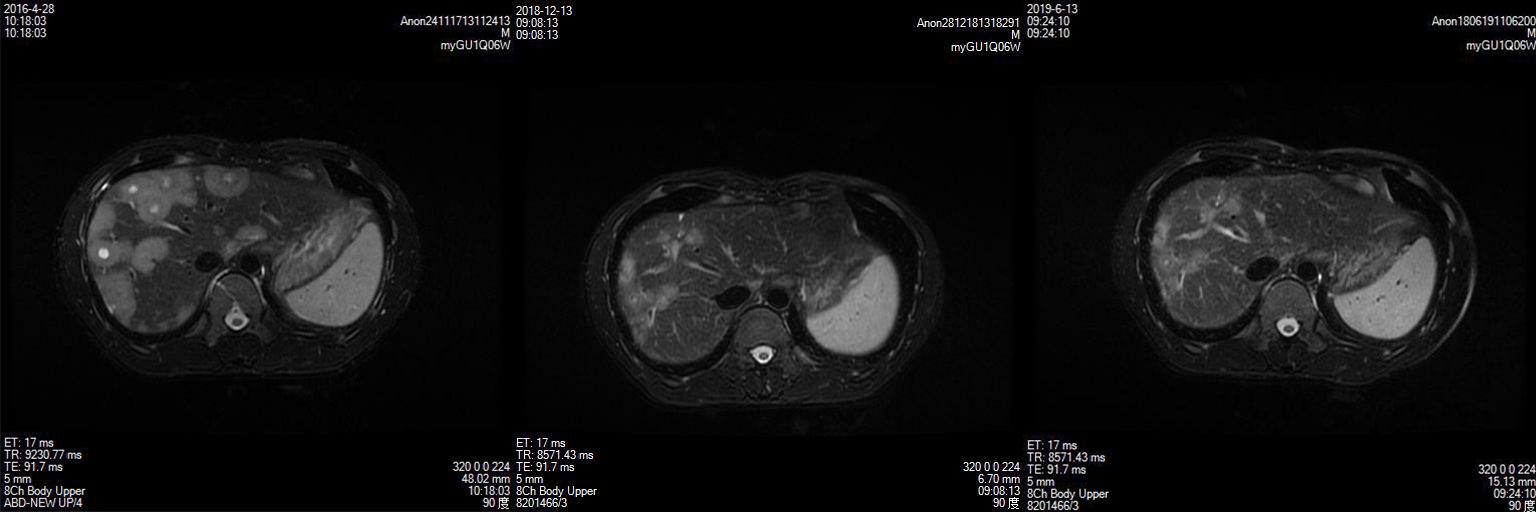 |
|  |  |
| 4# Partial Response | |
| 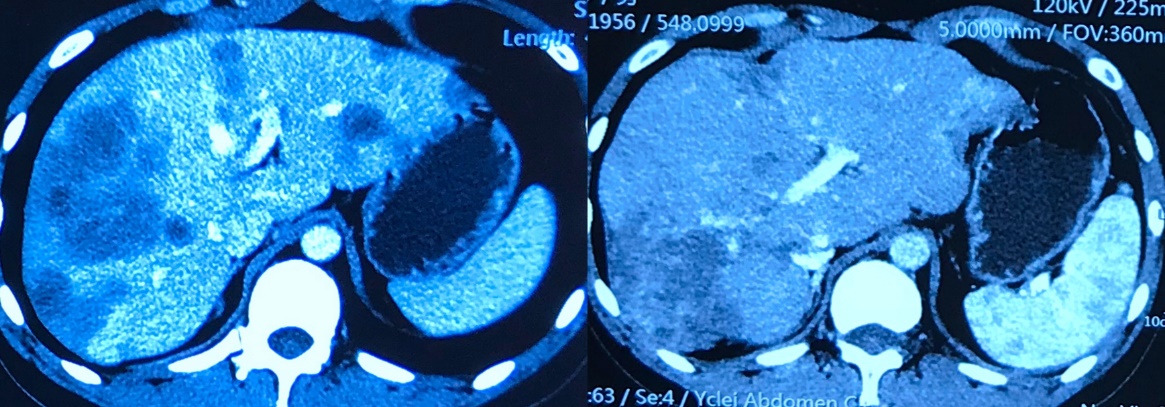 | 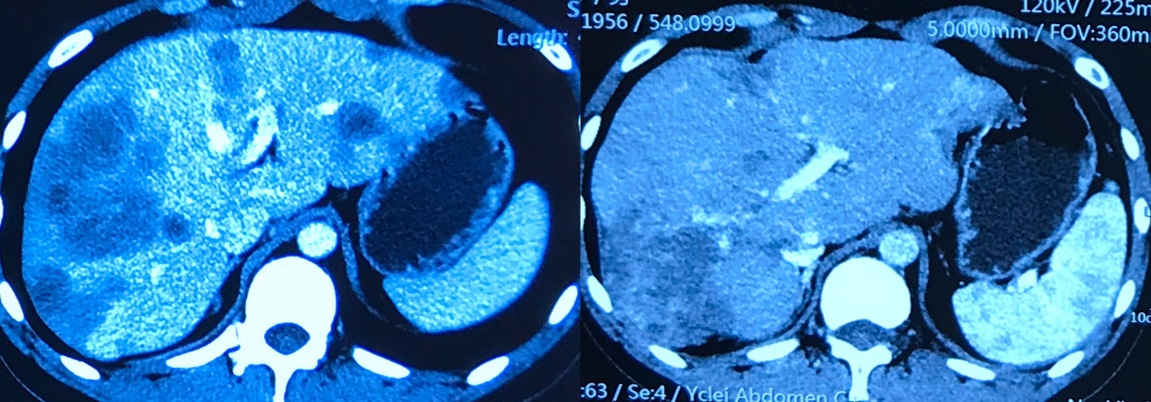 |
| 5# Partial Response | |
| 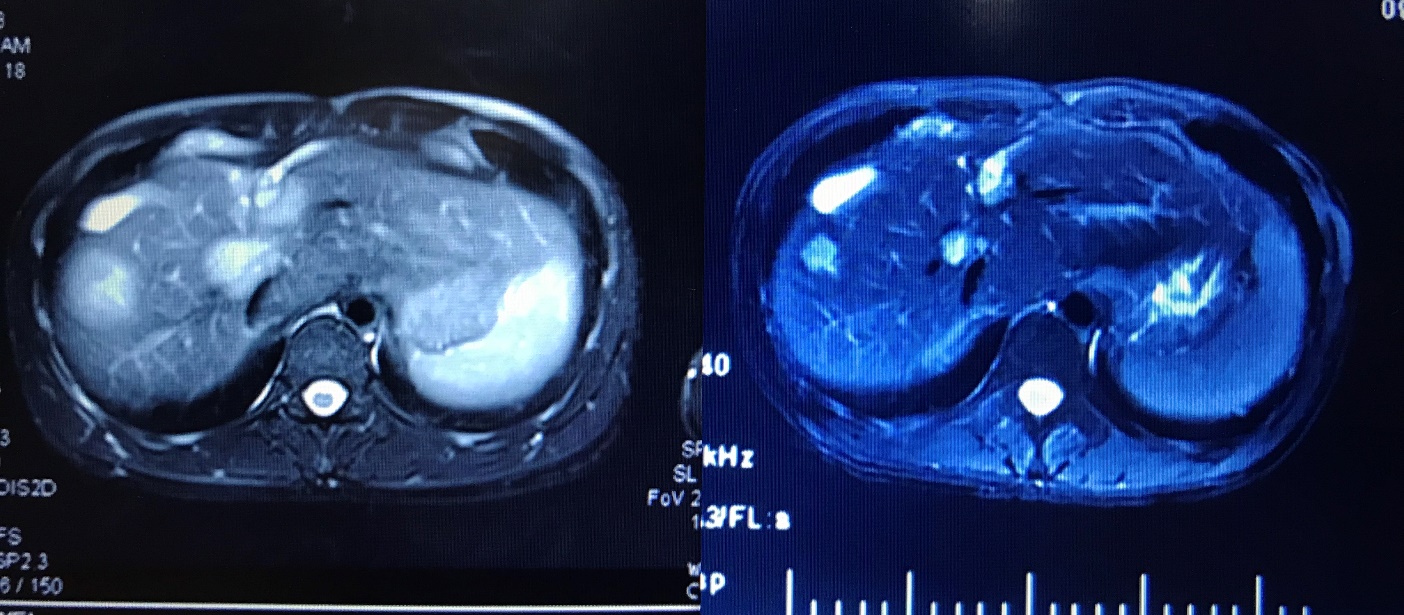 | 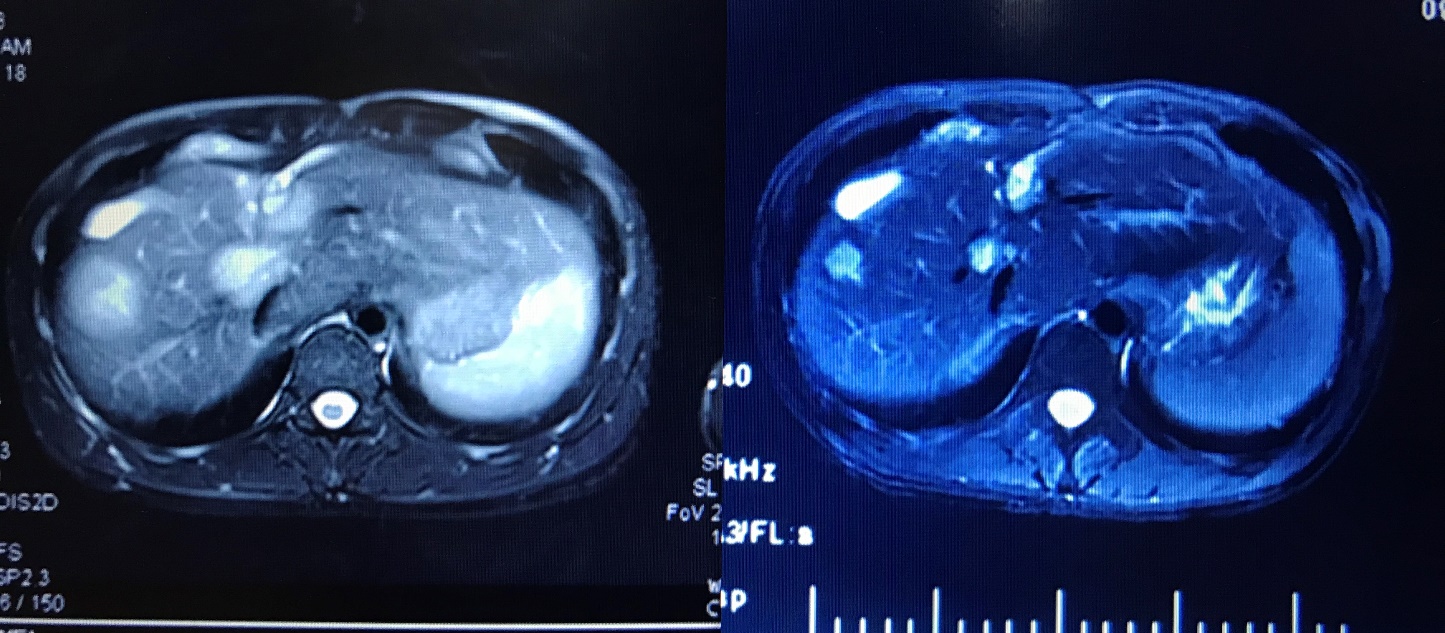 |
| 6# Partial Response | |
| 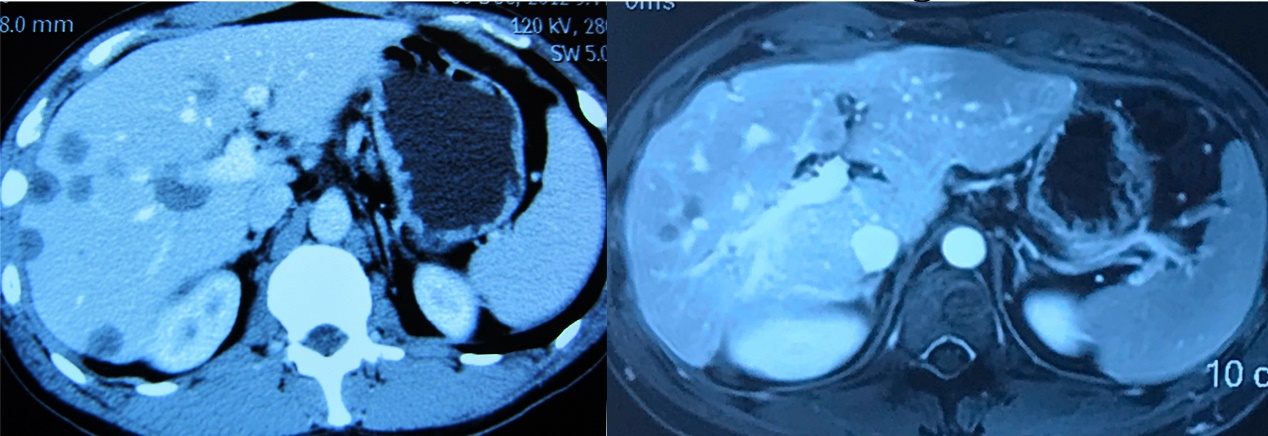 | 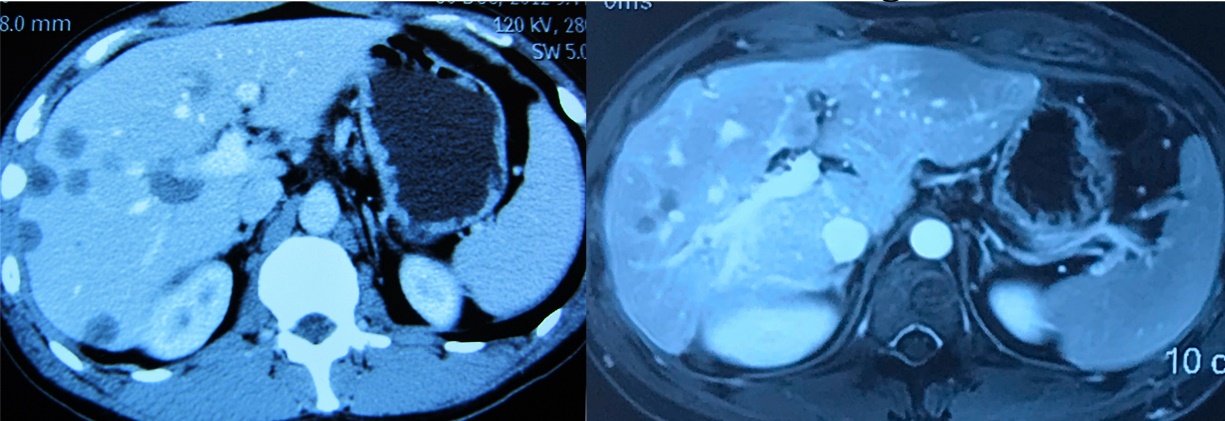 |
| 7# Partial Response | |
| 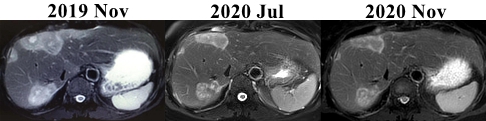 | 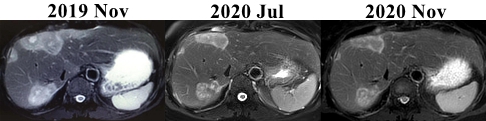 |
| 8# Partial Response | |
| 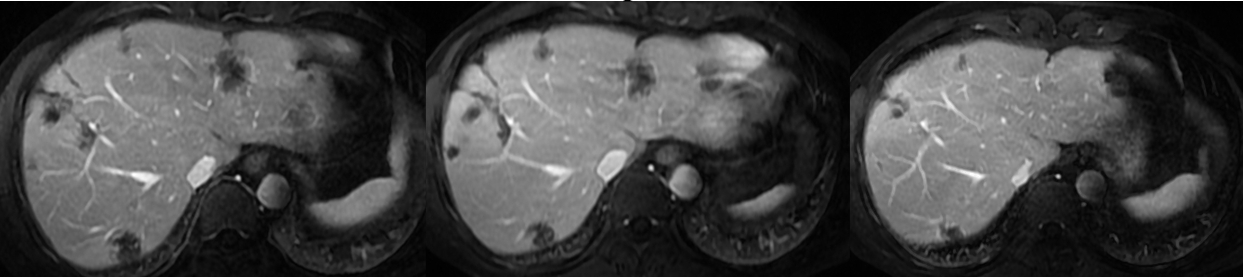 | 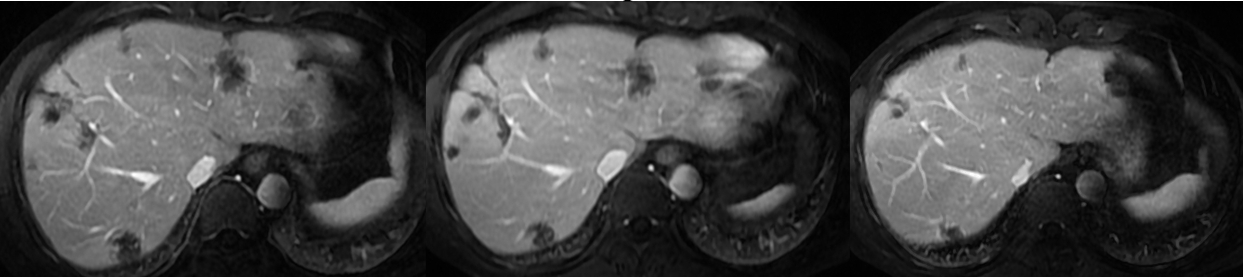 |
| 9# Partial Response | |
| 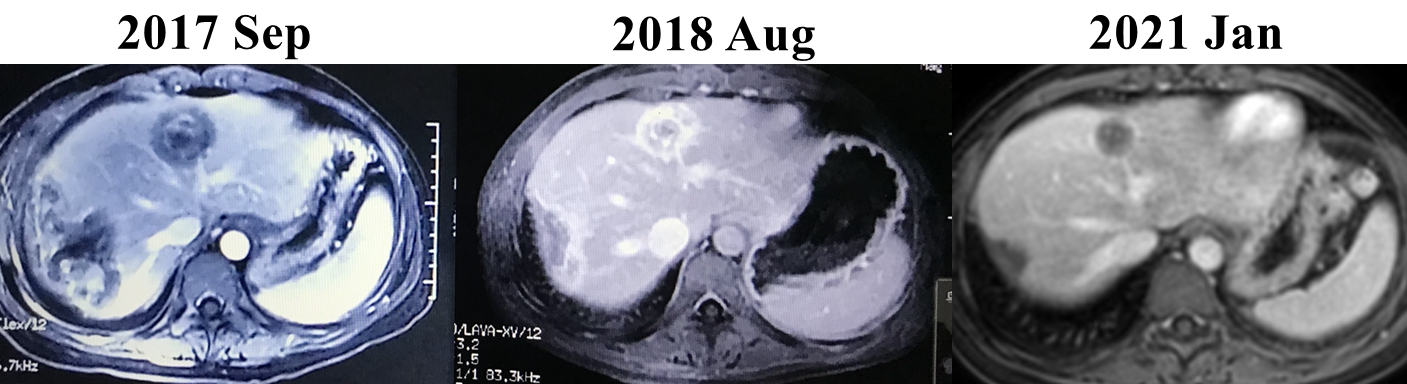 | 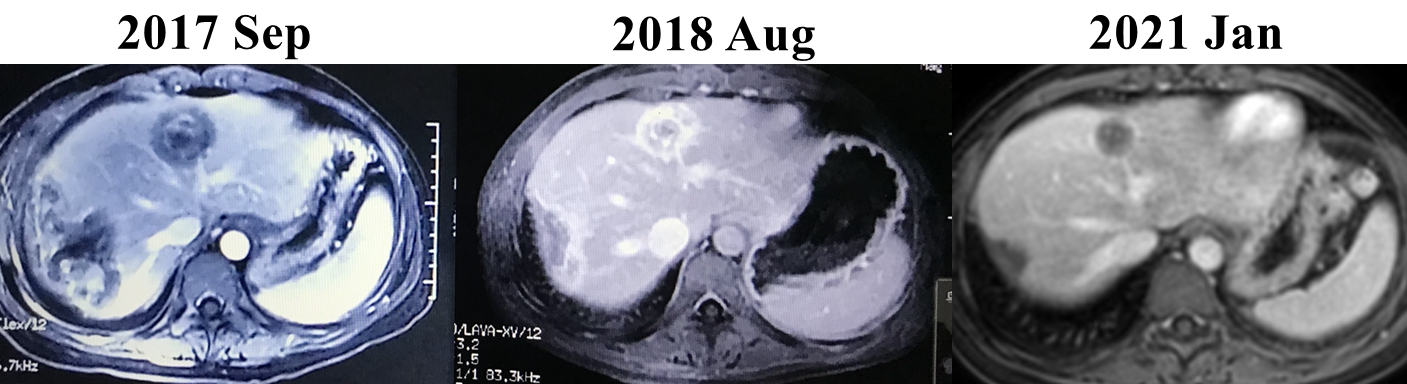 |
| 10# Partial Response | |
| 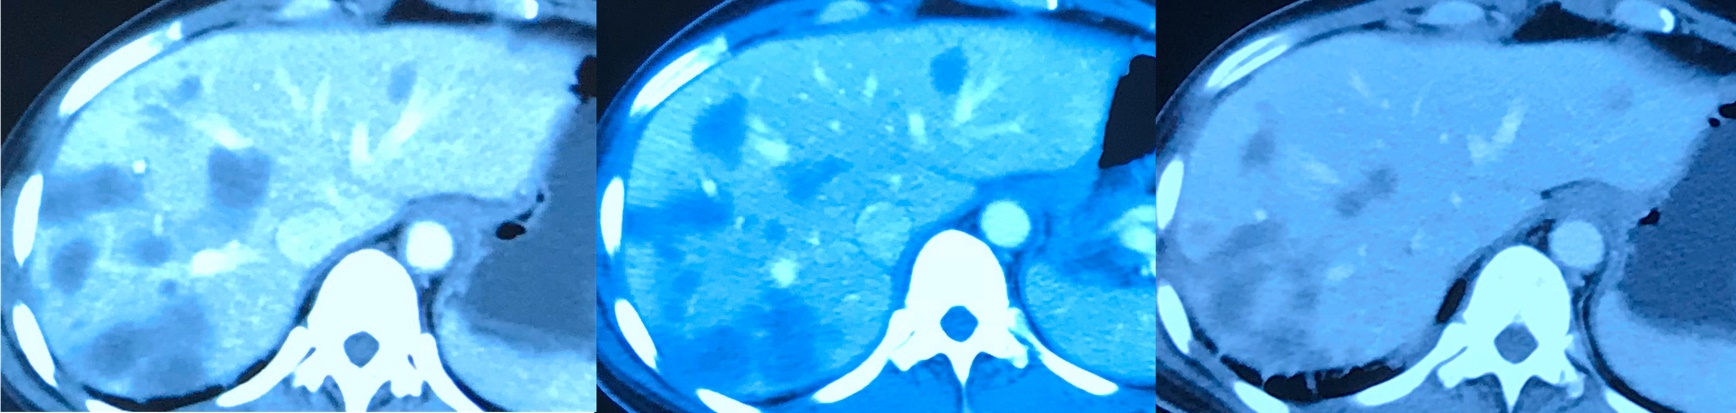 | 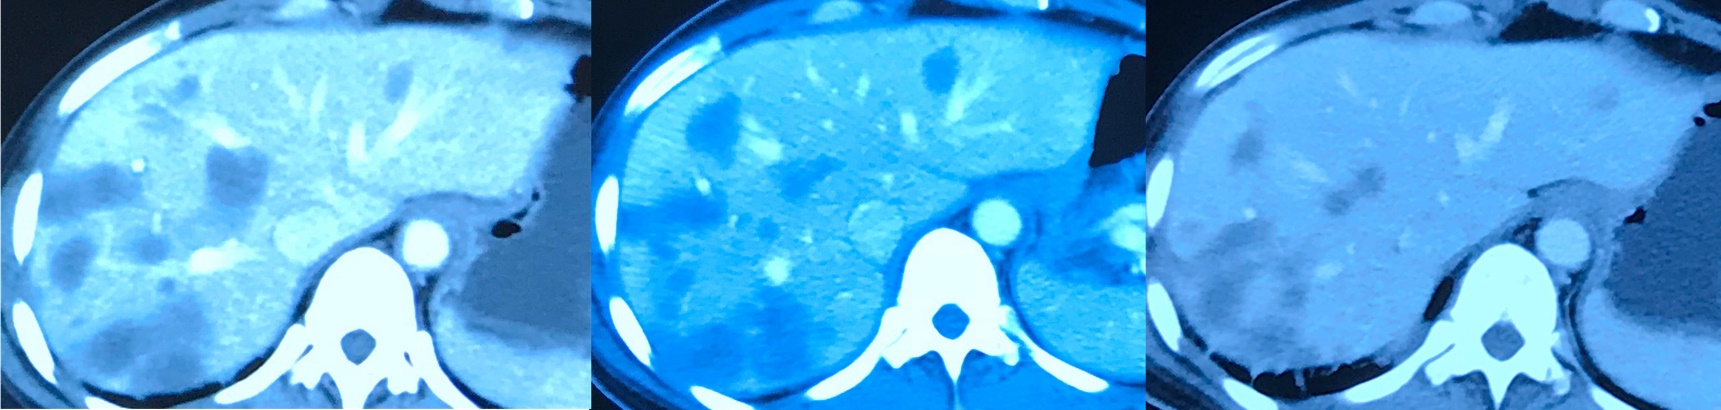 |
| 11# Partial Response | |
| 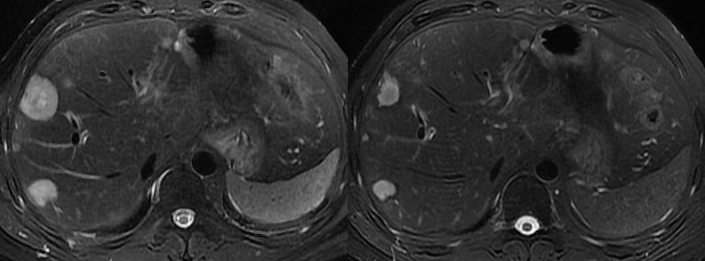 | 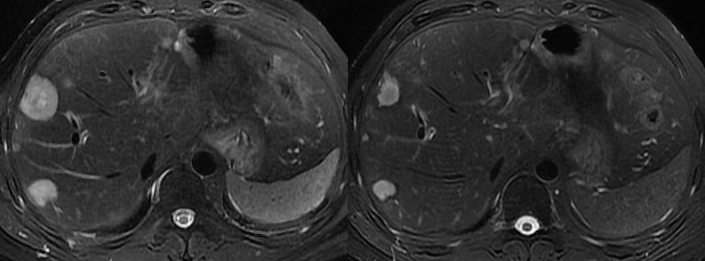 |
| 12# Partial Response | |
| 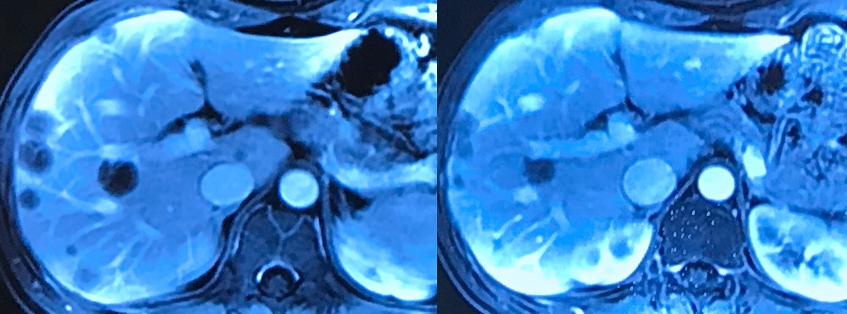 | 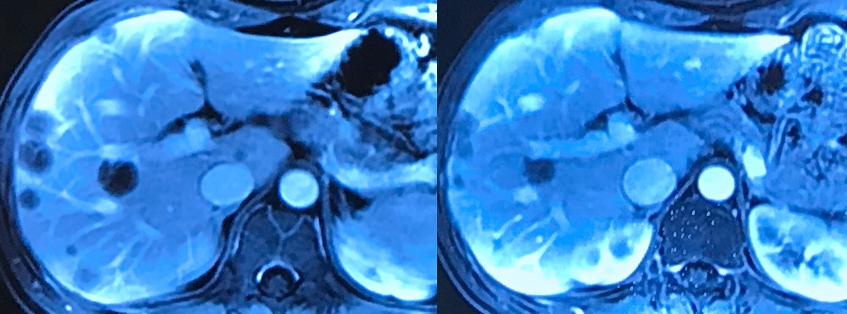 |
| 13# Partial Response | |
| 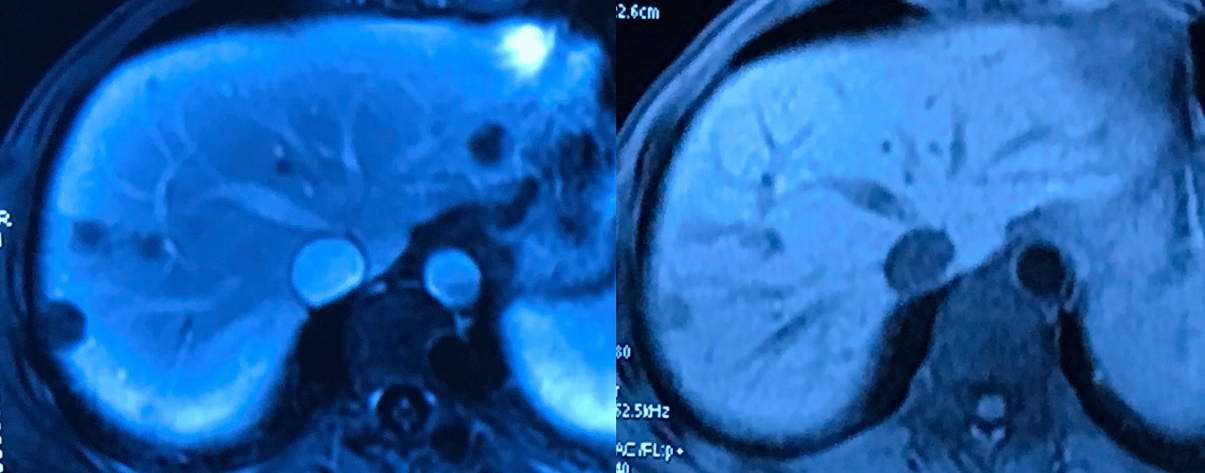 | 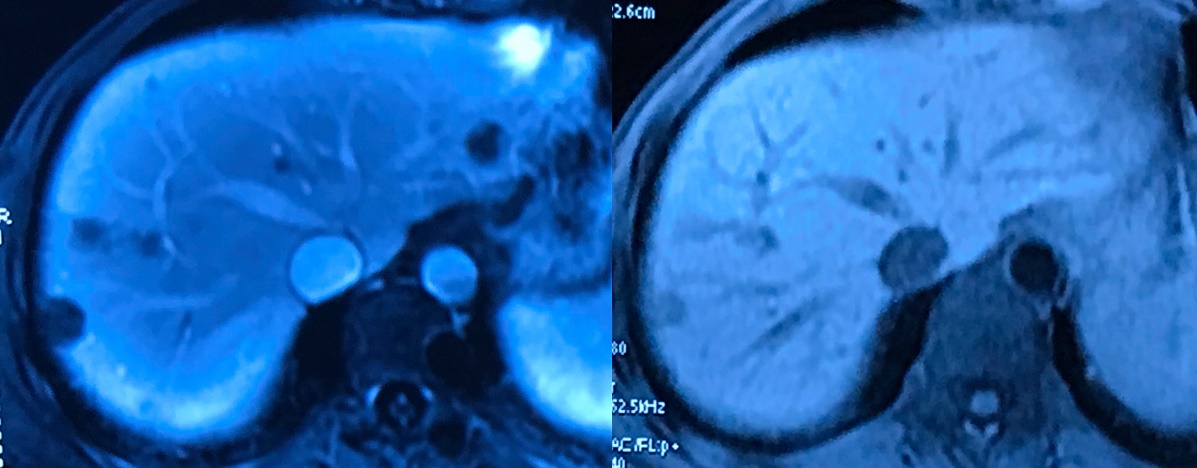 |
| 14# Partial Response | |
| 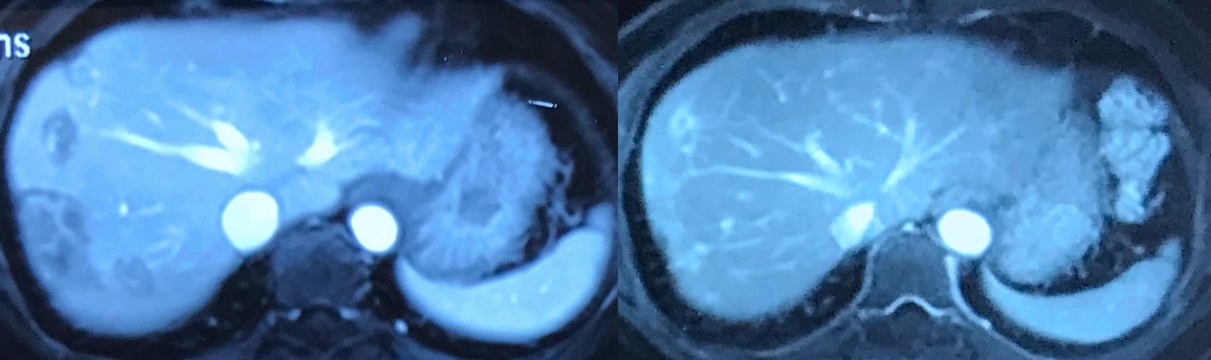 | 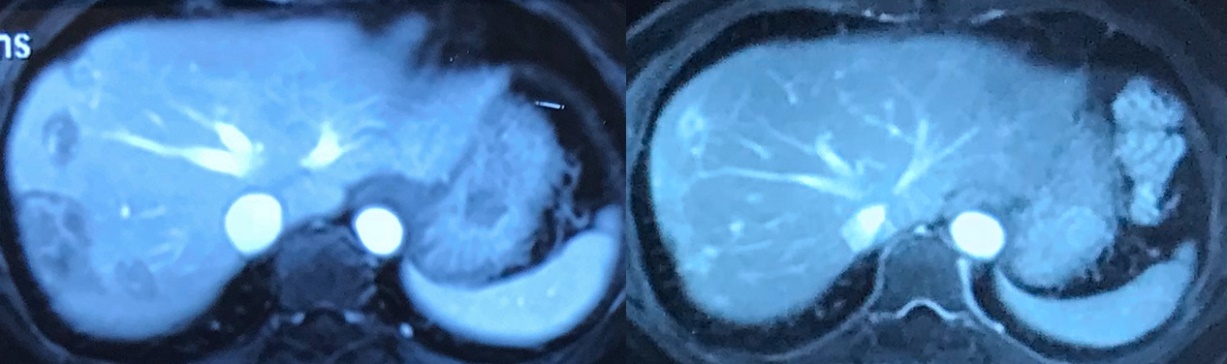 |
| 15# Partial Response | |
| 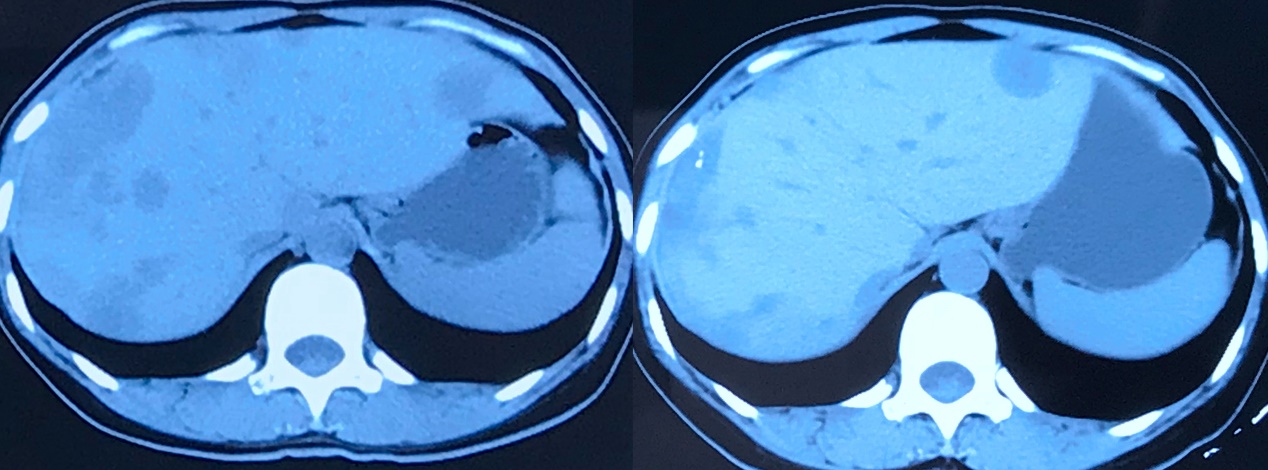 | 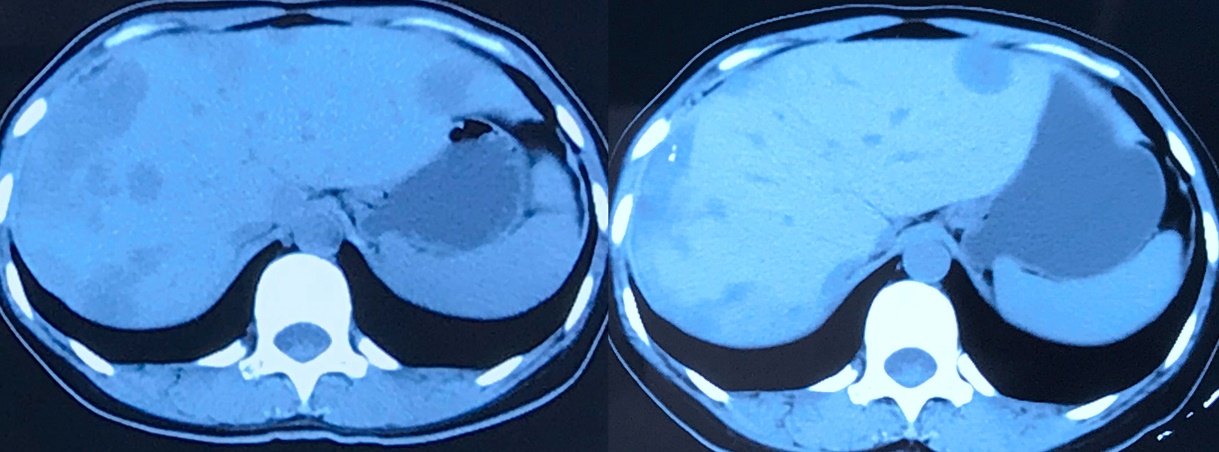 |
| 16# Partial Response | |
| 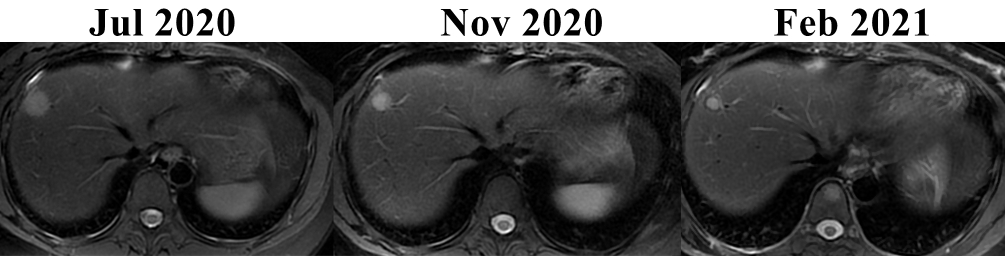 | 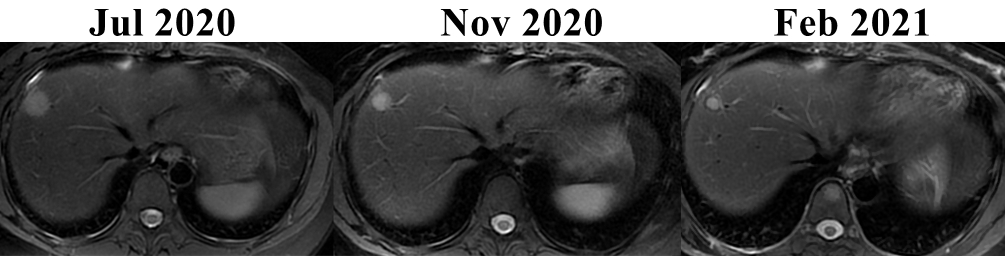 |
| 17# Partial Response | |
| 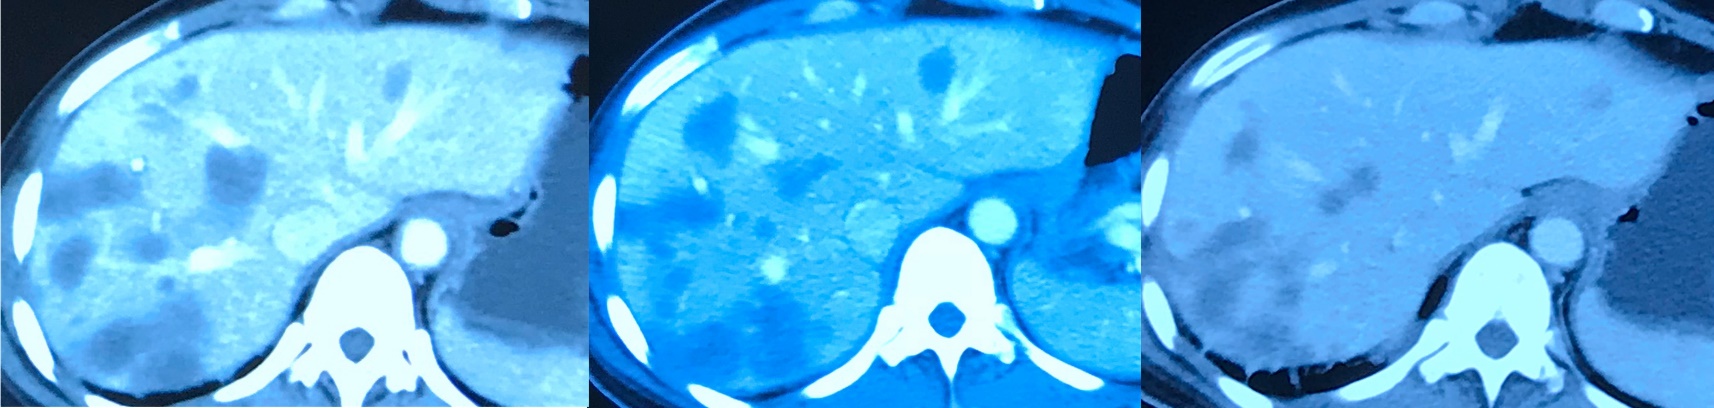 | 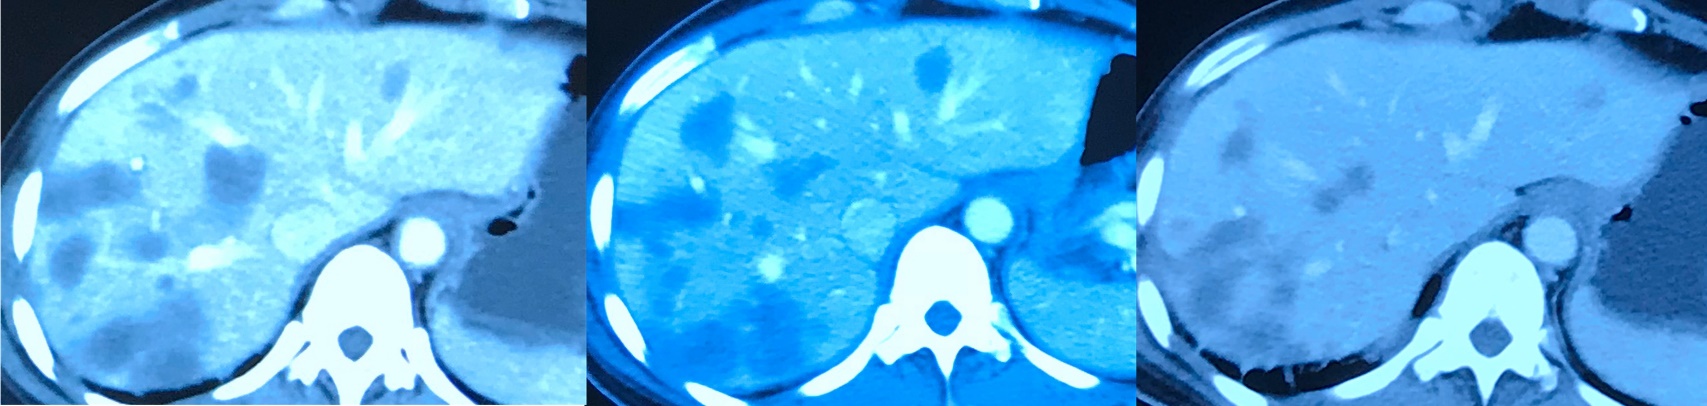 |
| 18# Partial Response | |
| 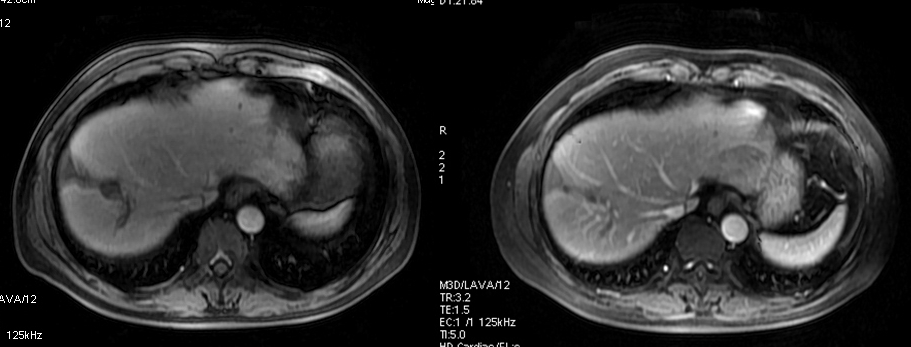 | 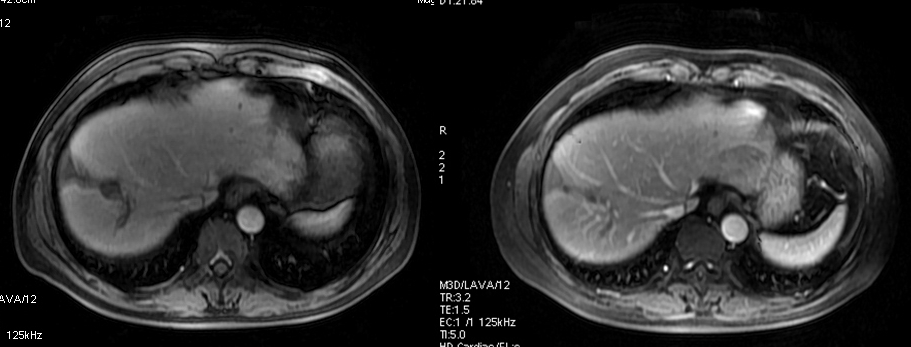 |
| 19# Partial Response (Comparison of lesion marked with white arrow) | |
| 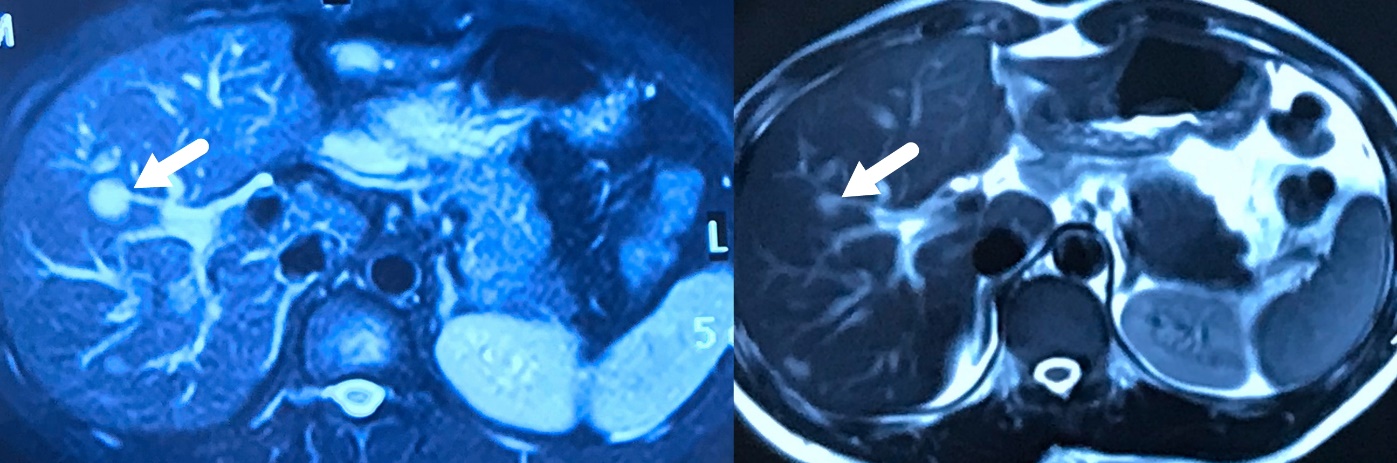 | 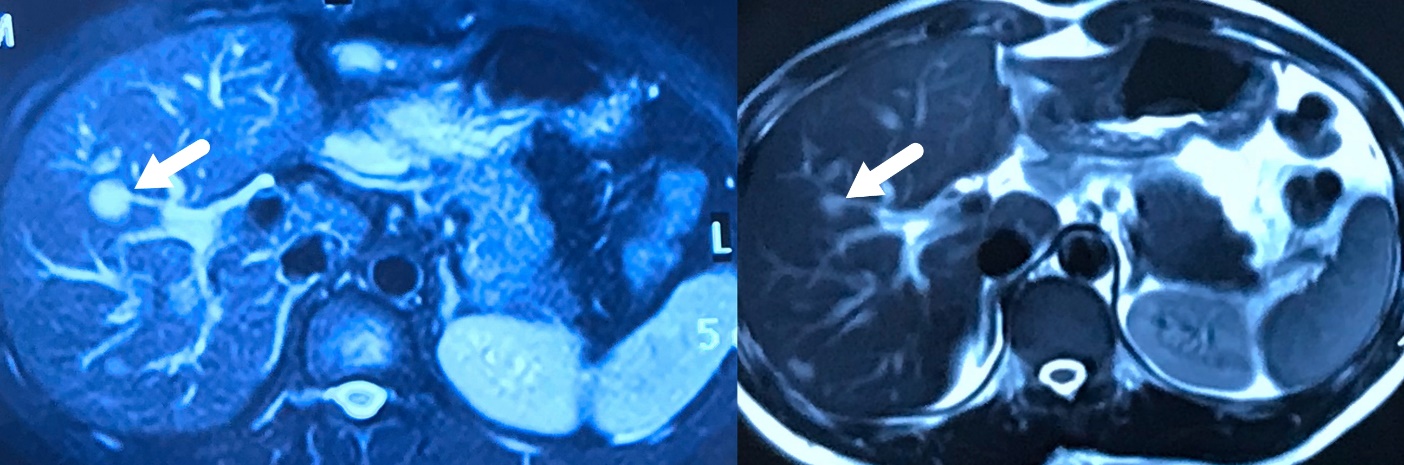 |
| 20# Partial Response | |
| 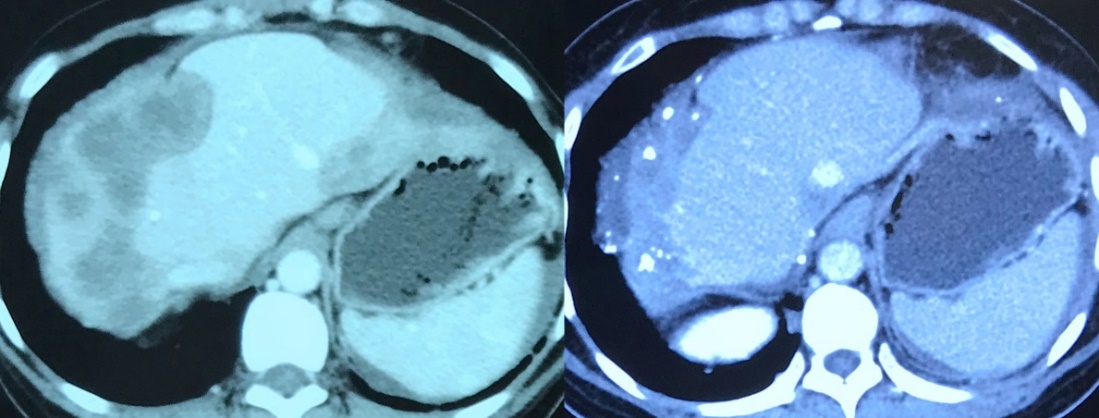 | 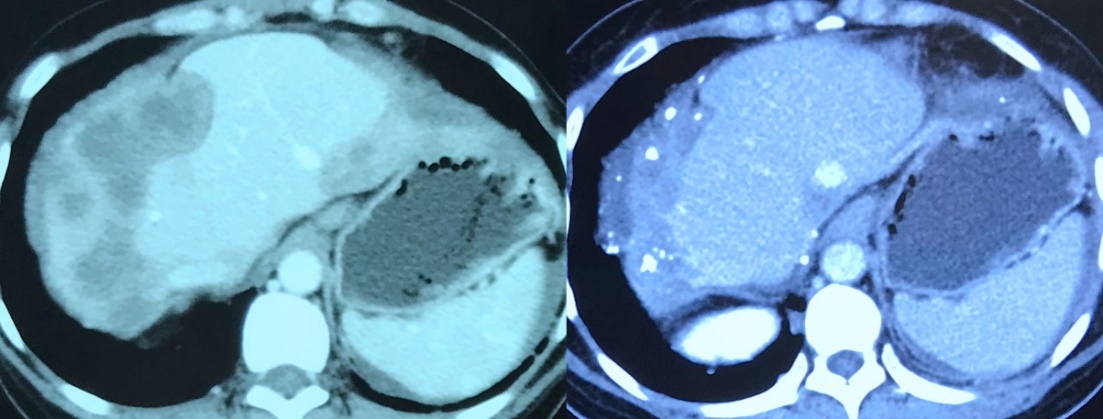 |
| 21# Partial Response | |
| 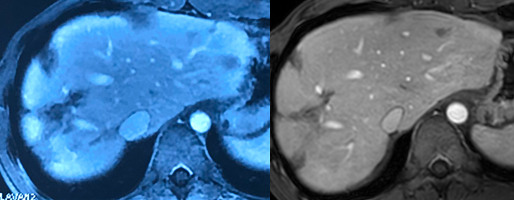 | 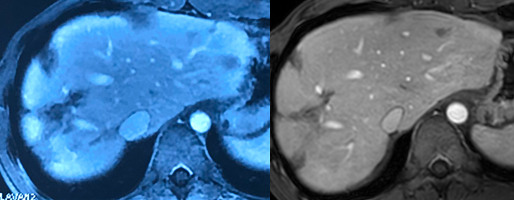 |
| 22# Partial Response | |
| 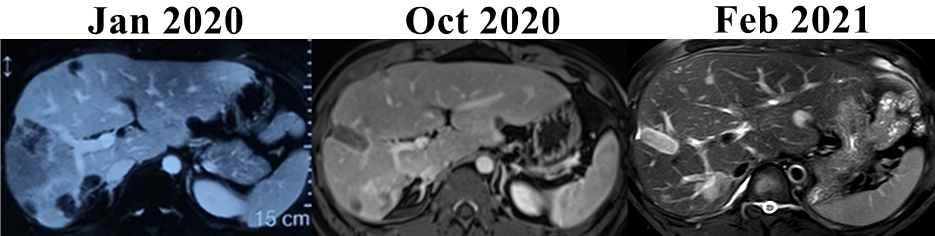 | 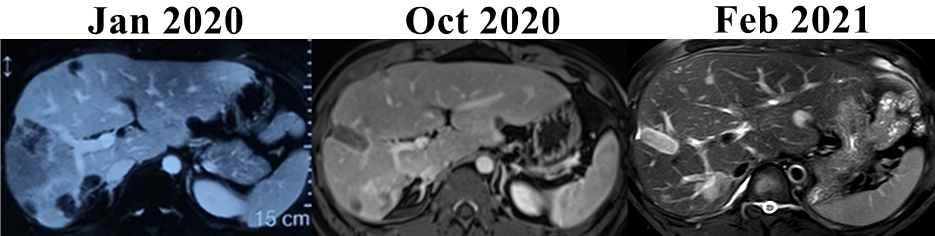 |
| 23# Stable Disease | |
| 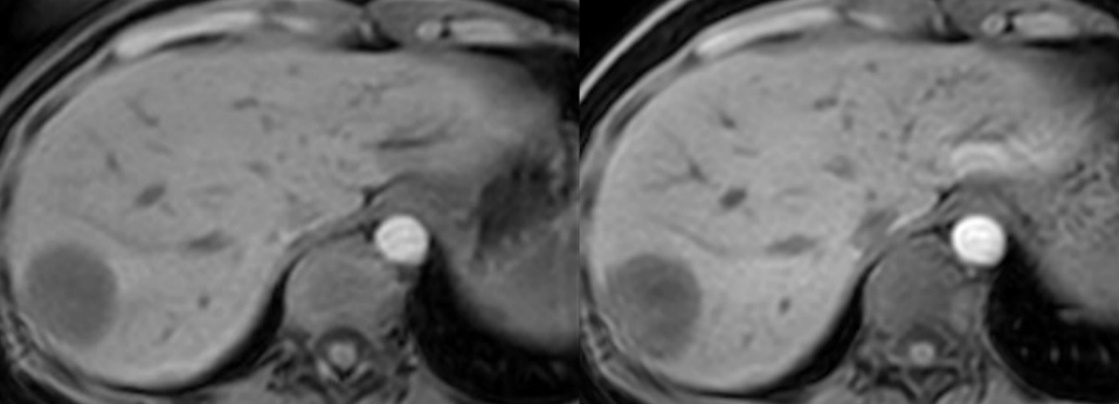 | 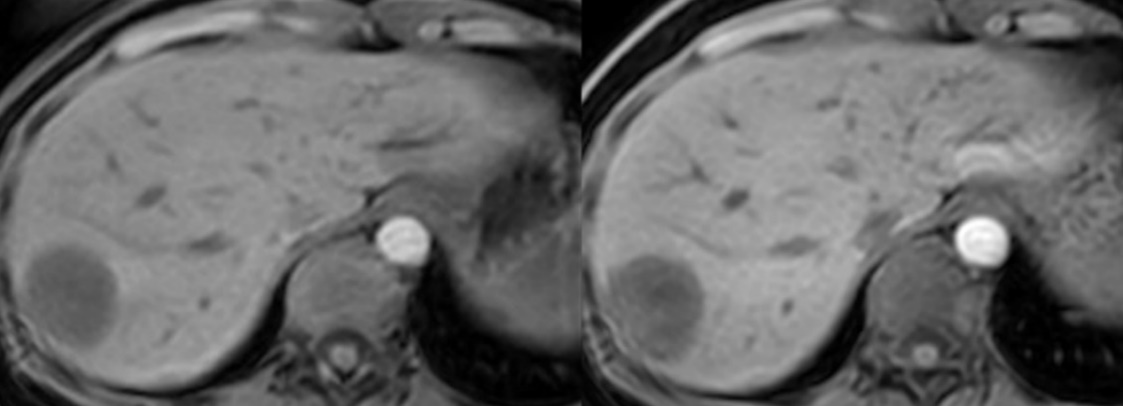 |
| 24# Stable Disease | |
| 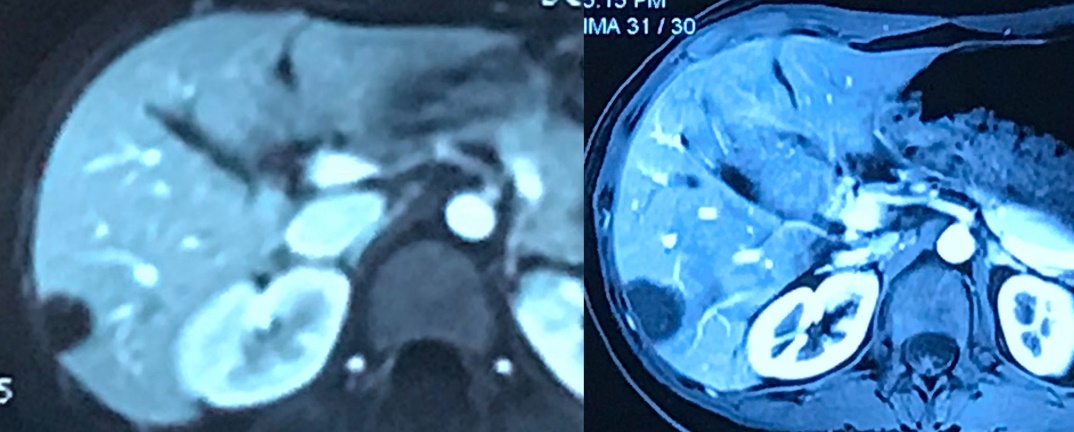 | 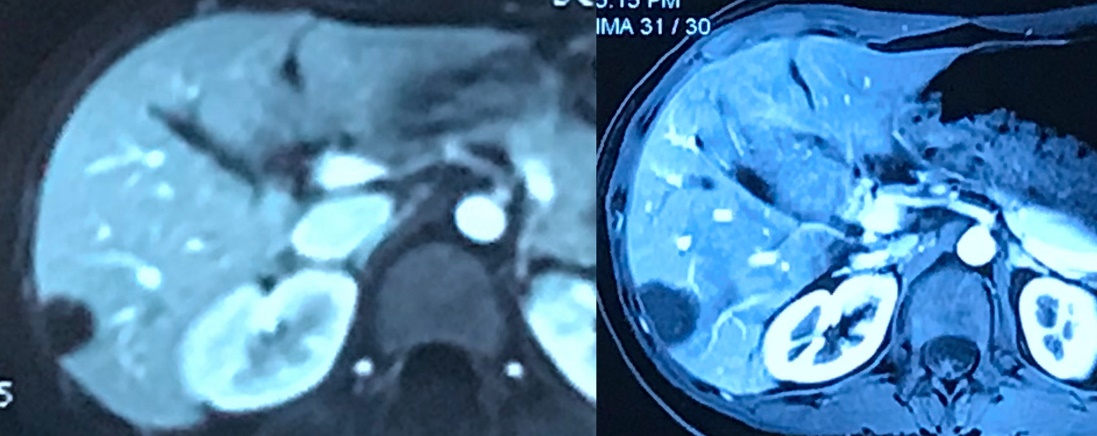 |
| 25# Stable Disease | |
| 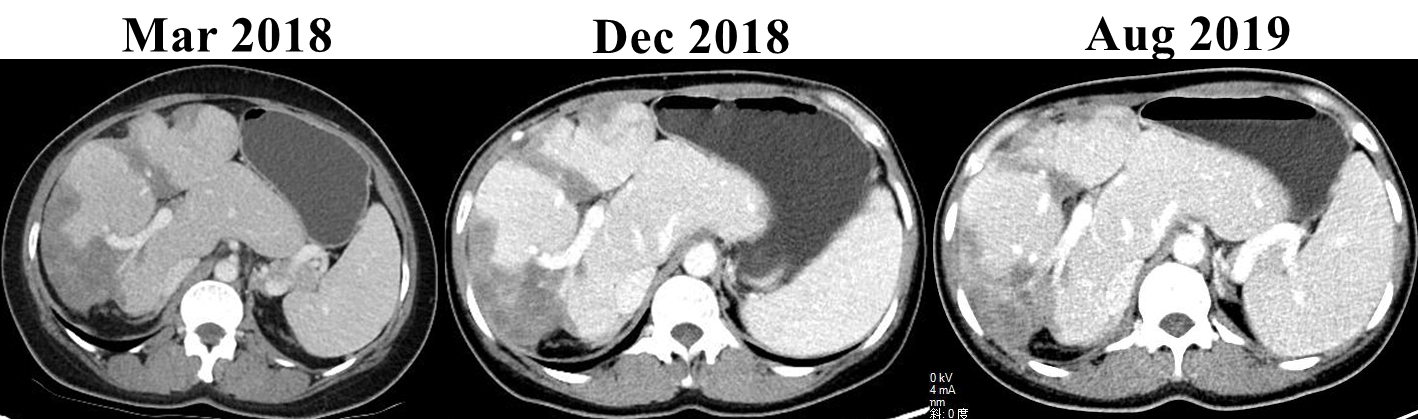 | 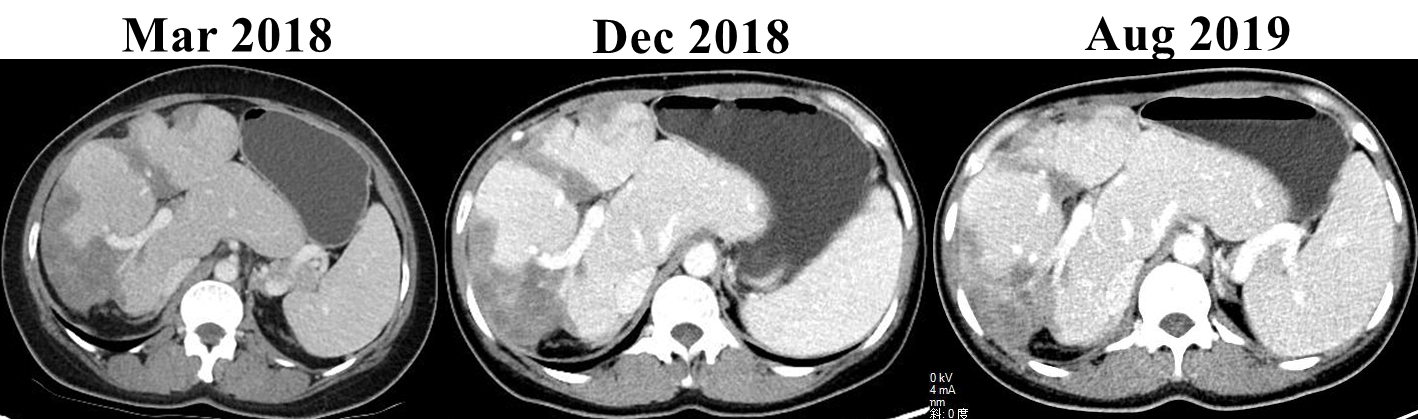 |
| 26# Stable Disease | |
| 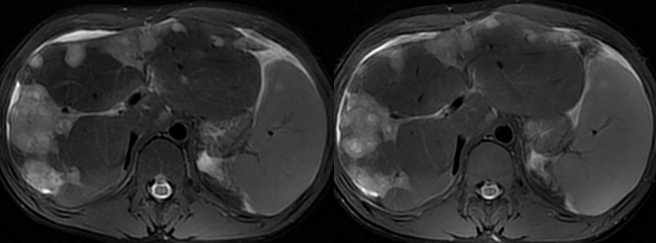 | 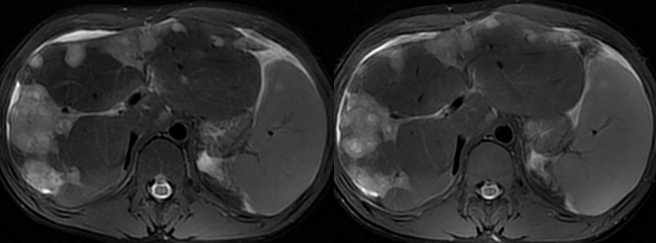 |
| 27# Stable Disease | |
| 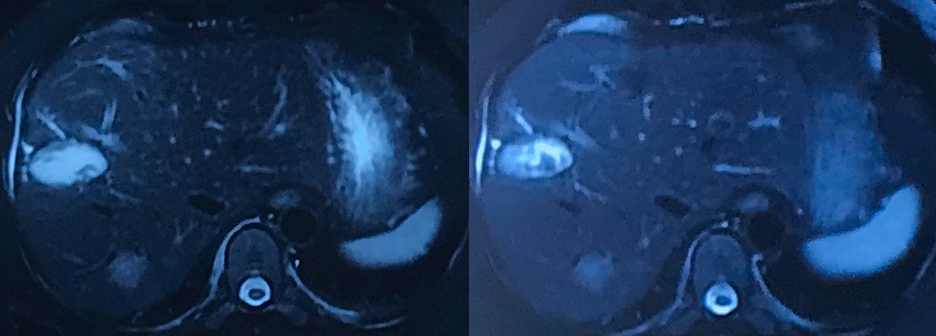 | 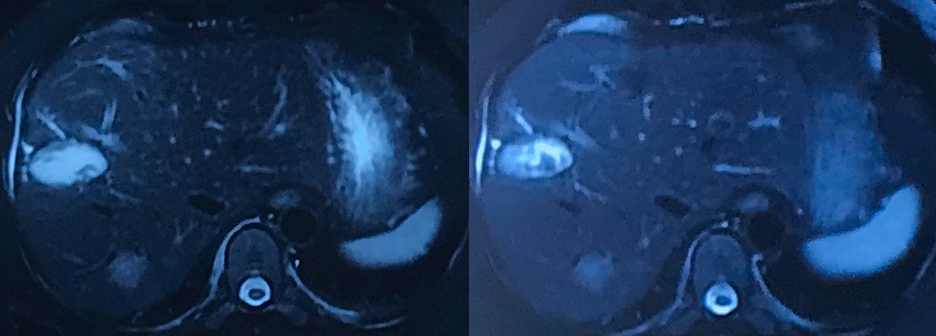 |
| 28# Stable Disease | |
| 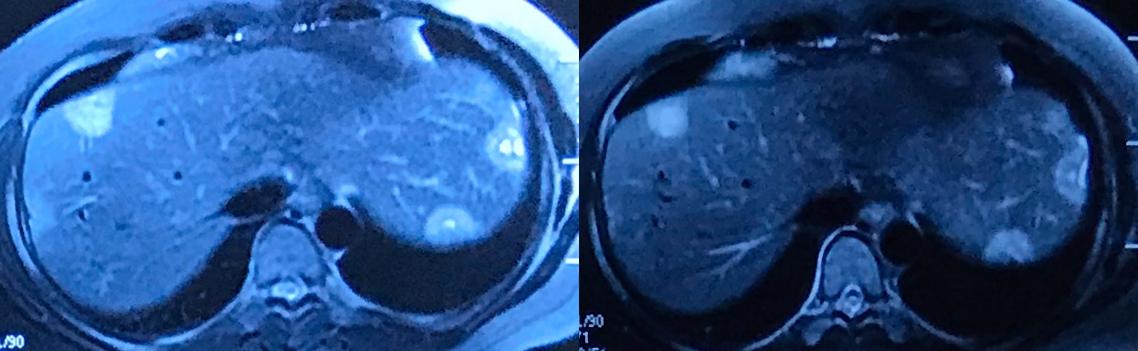 | 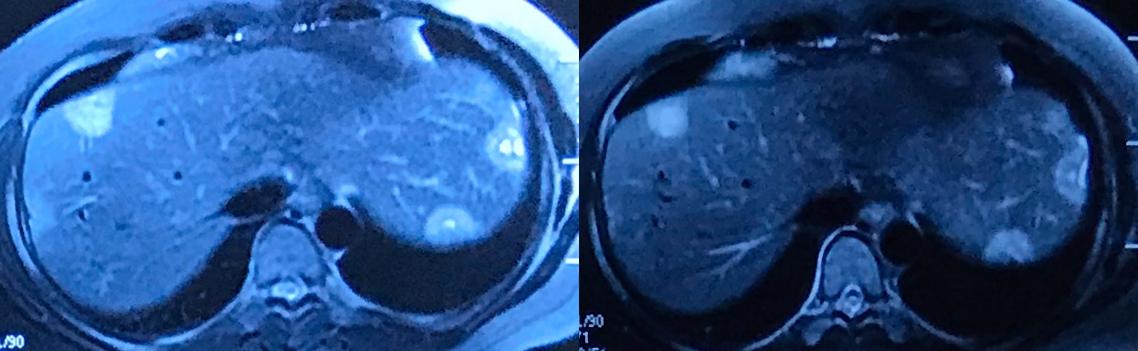 |
| 29# Stable Disease | |
| 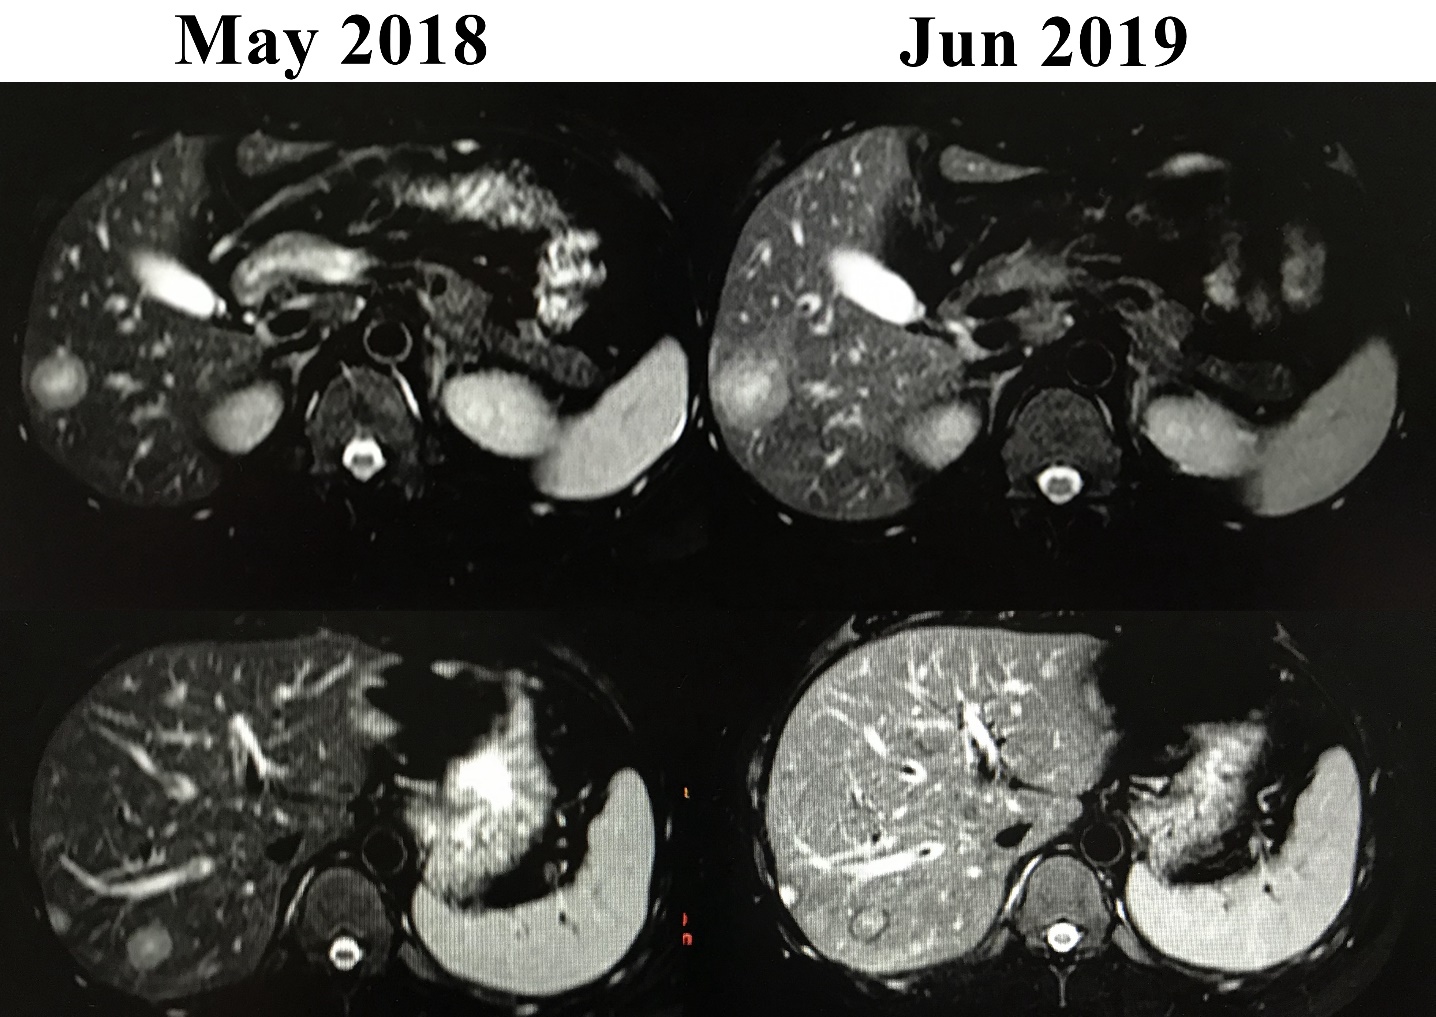 | 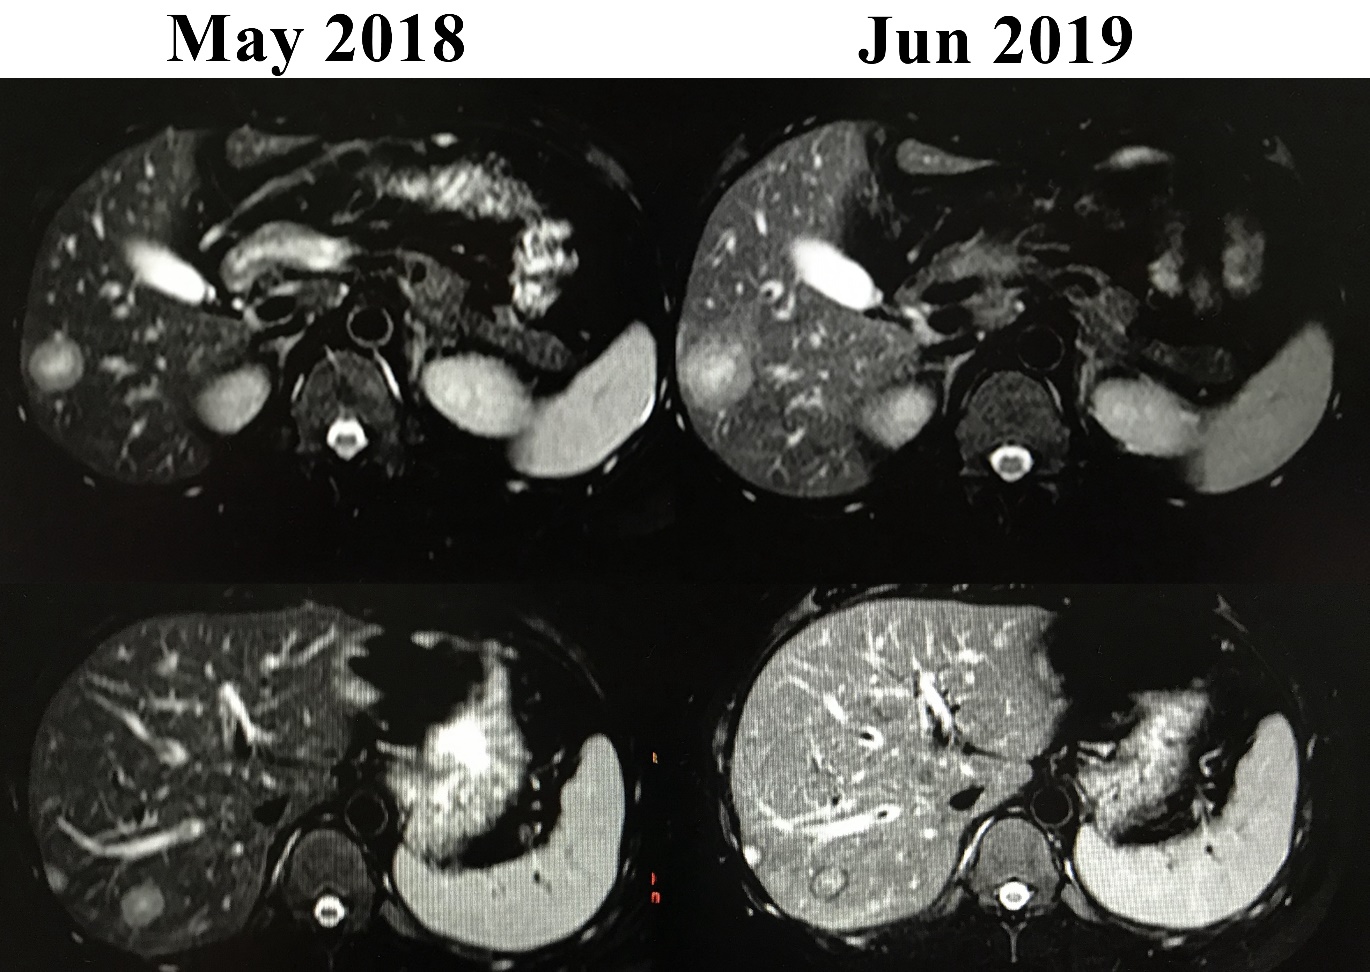 |
| 30# Stable Disease | |
| 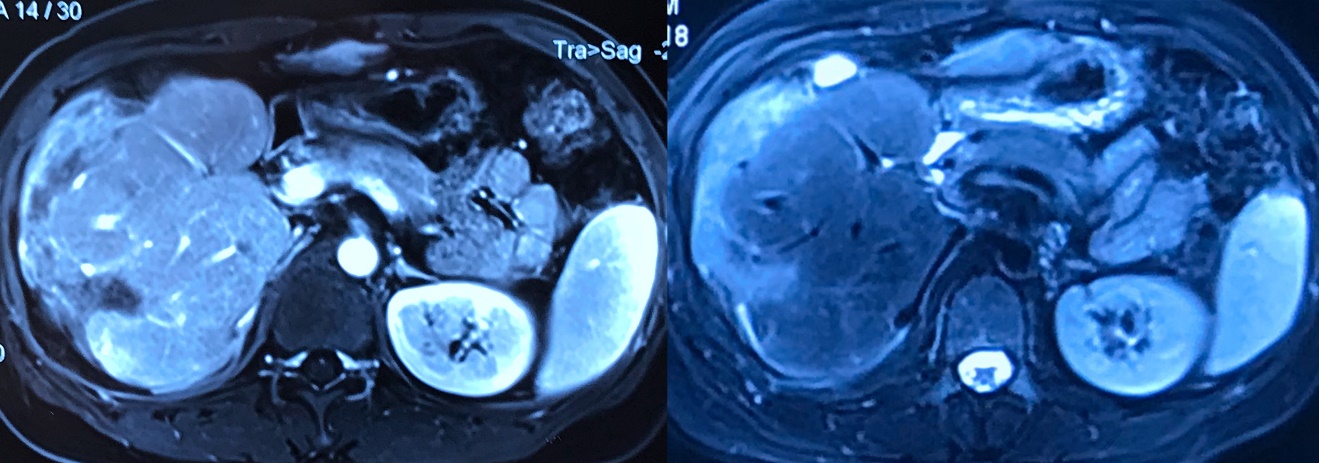 | 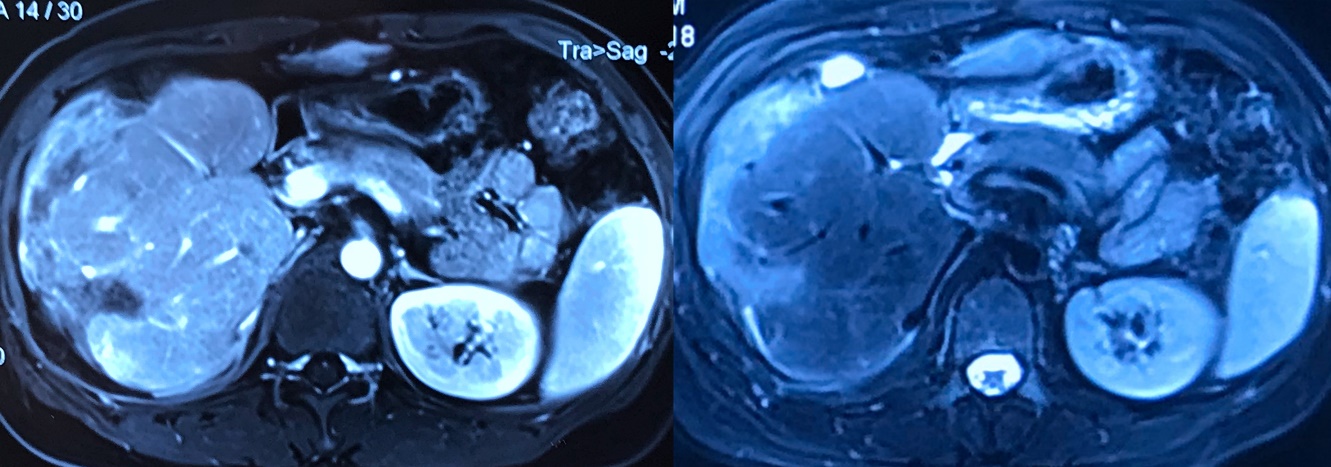 |
| 31# Stable Disease | |
| 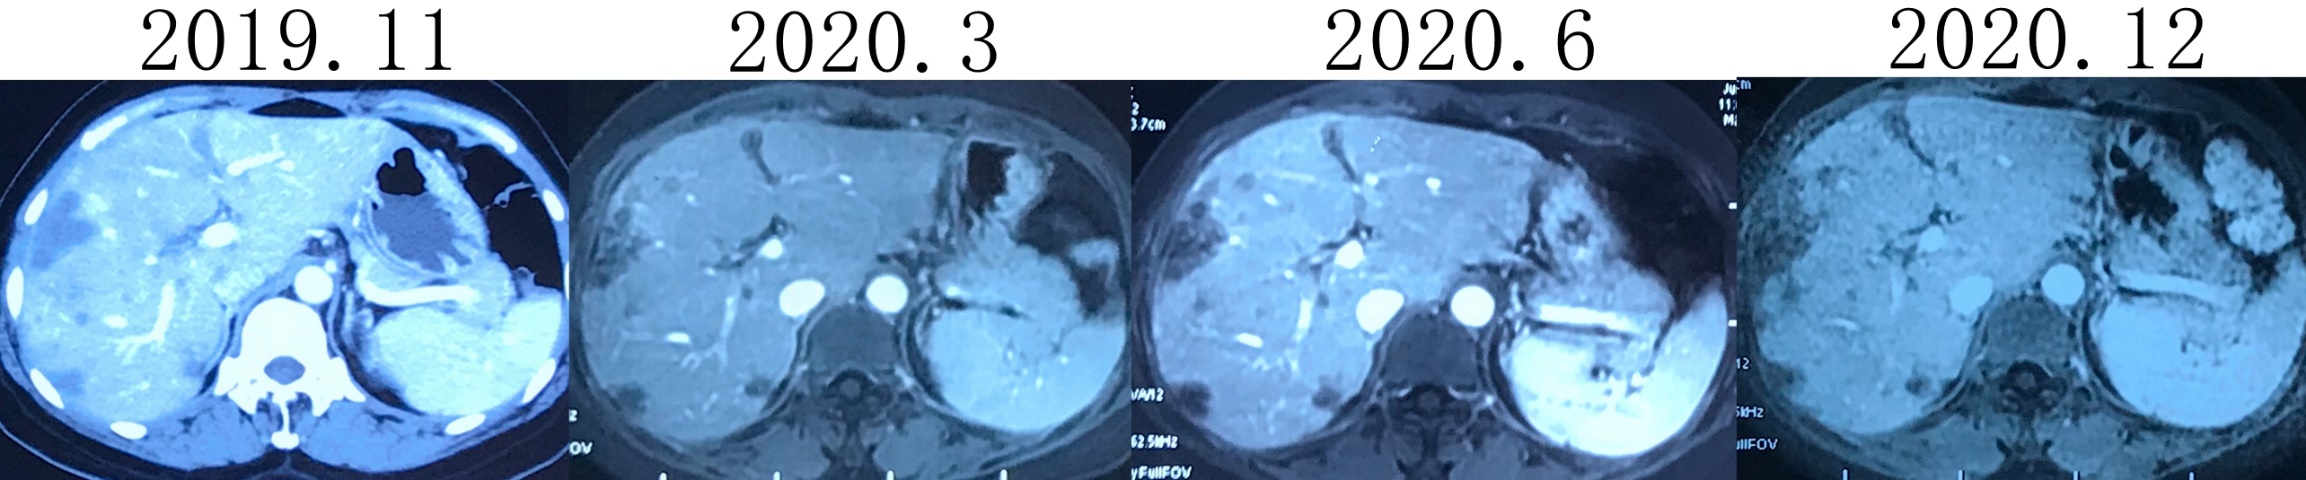 | 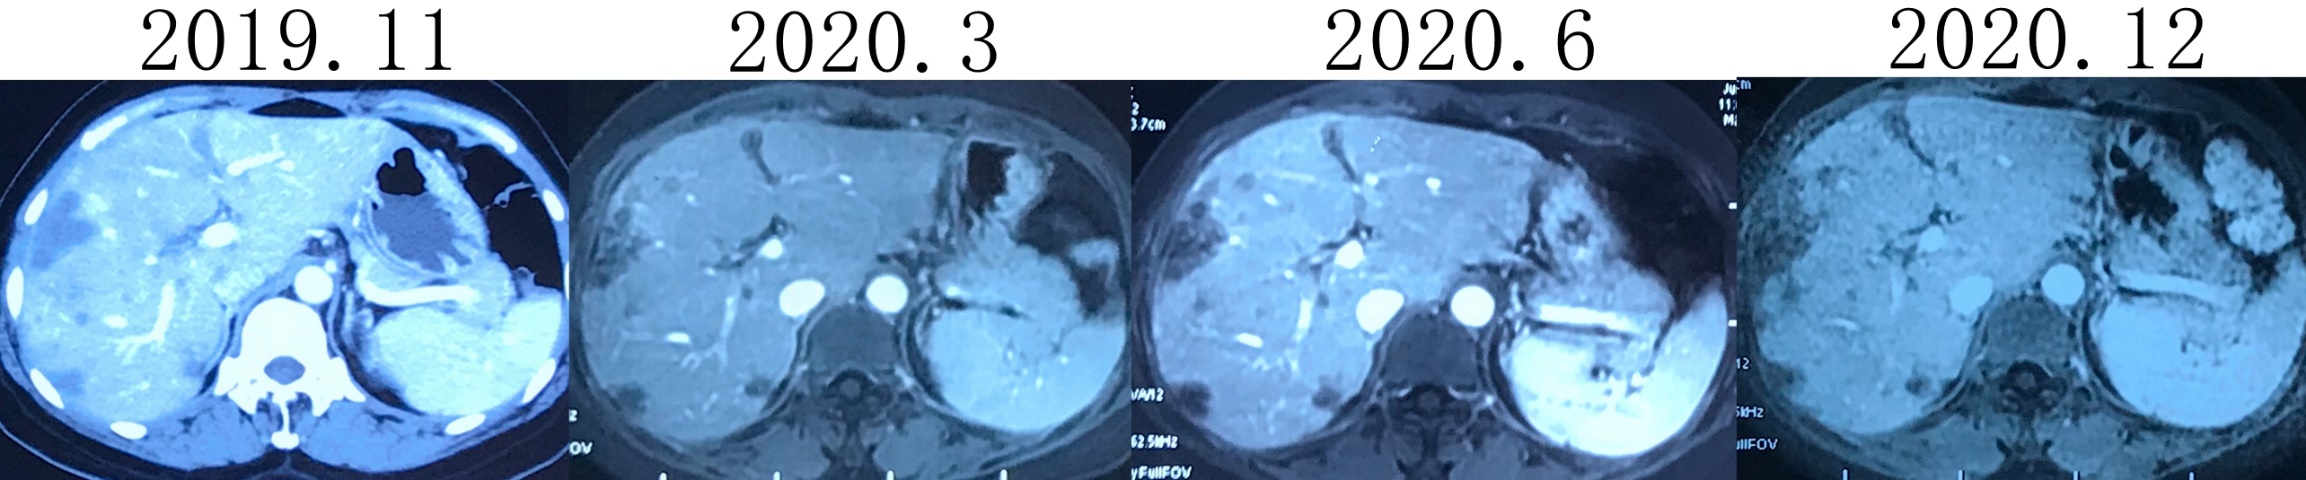 |
| 32# Stable Disease | |
| 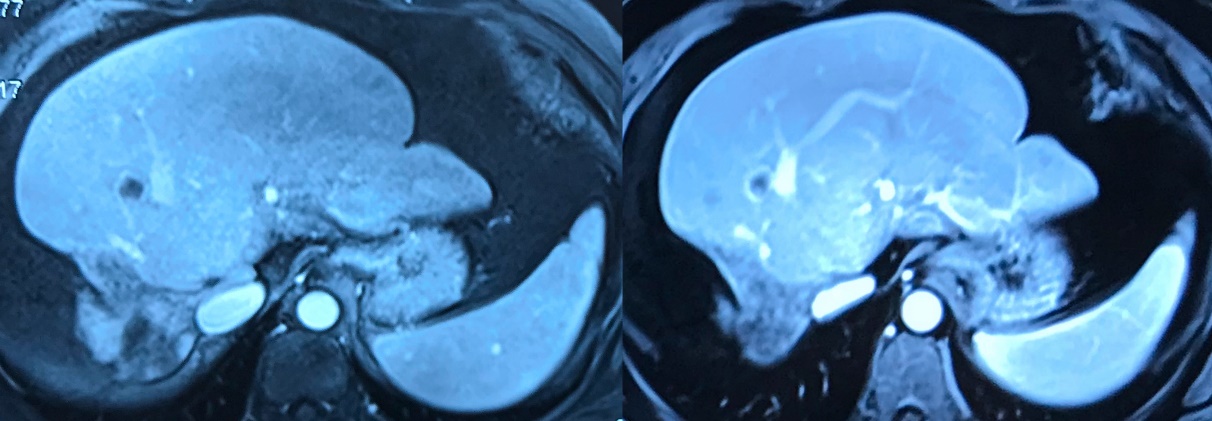 | 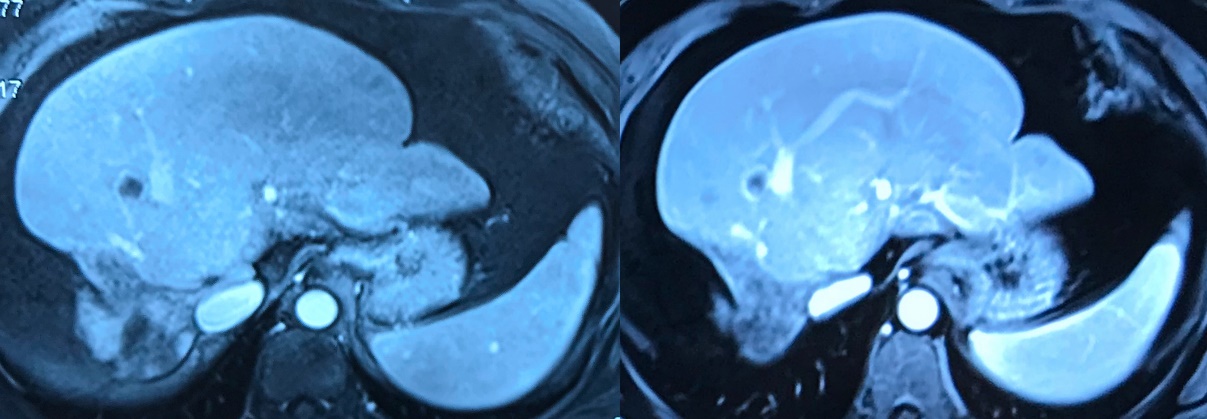 |
| 33# Stable Disease | |
| 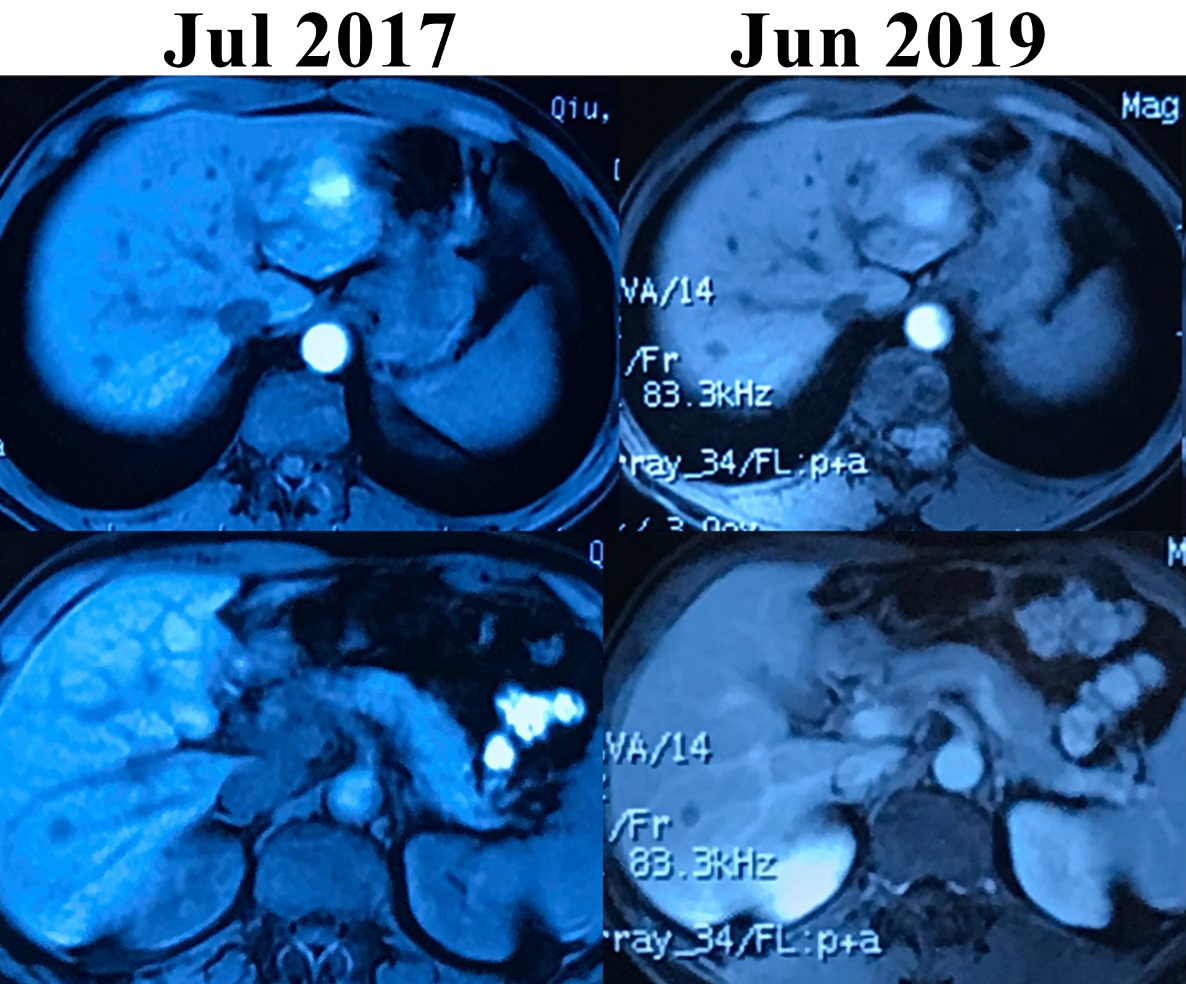 | 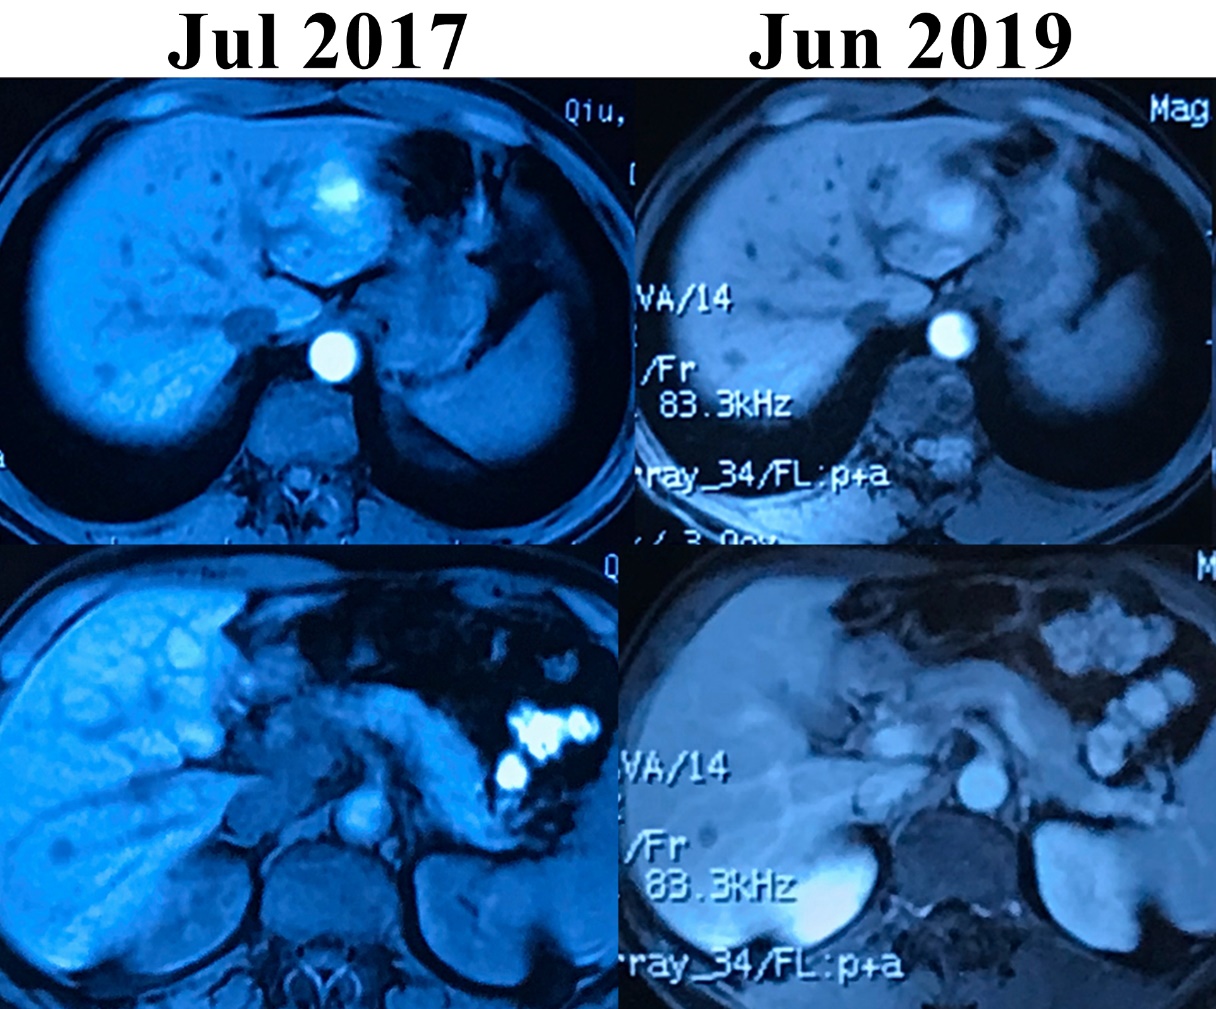 |
| 34# Stable Disease | |
| 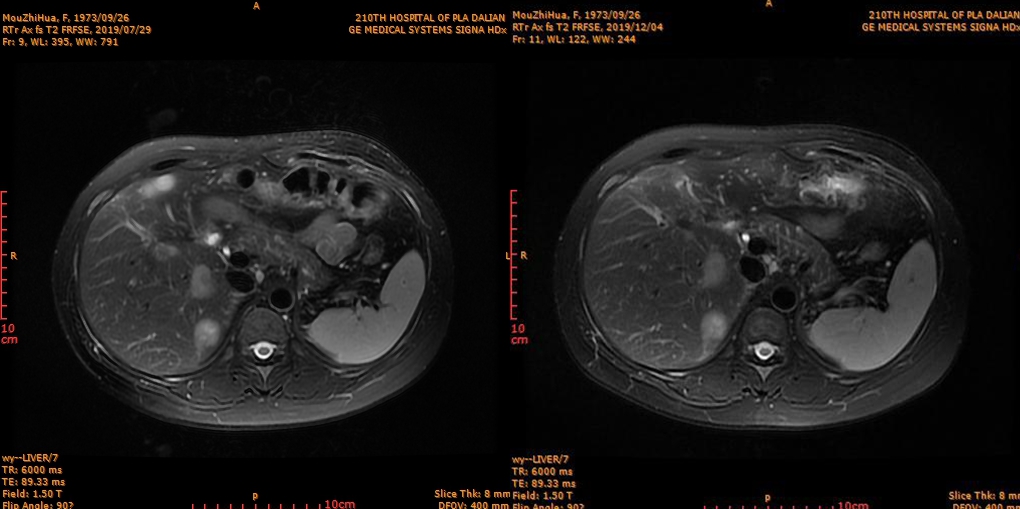 | 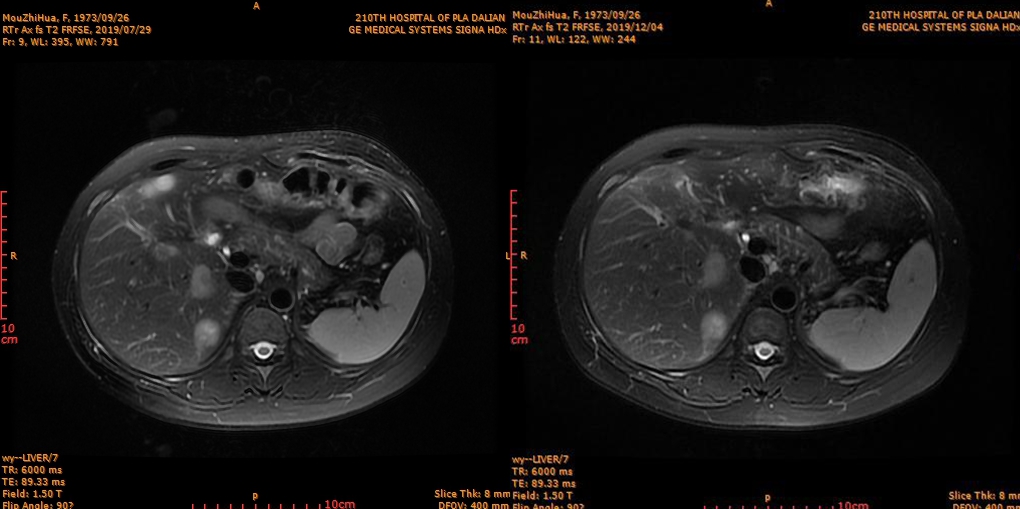 |
| 35# Progressed Disease | |
| 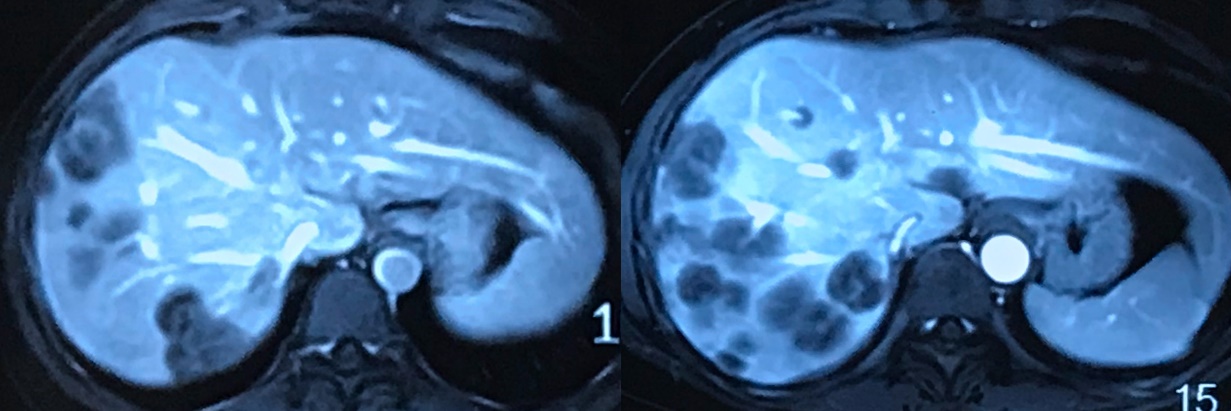 | 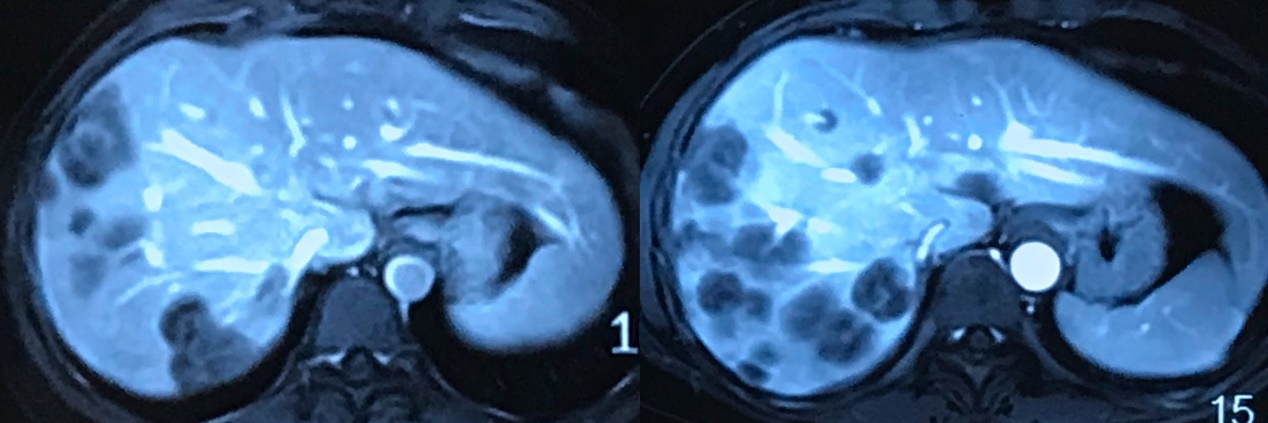 |
| 36# Progressed Disease | |
| 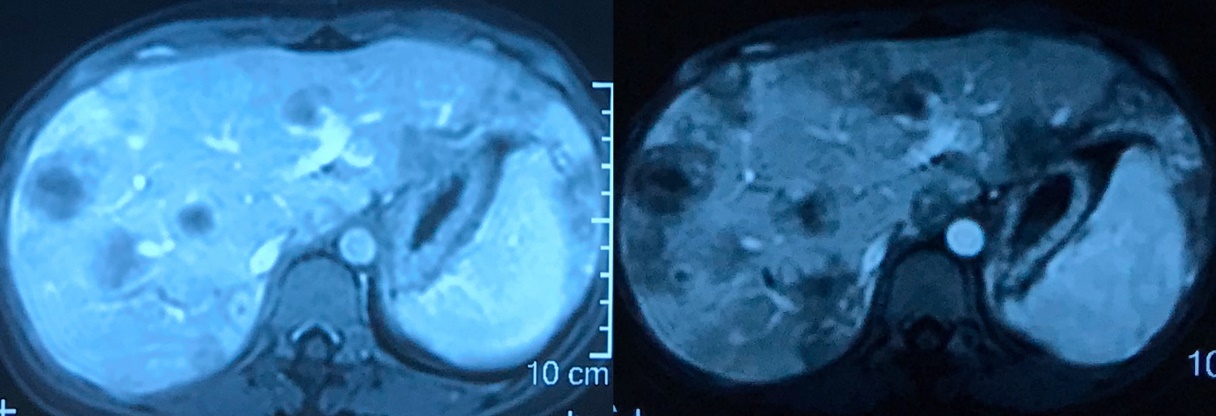 | 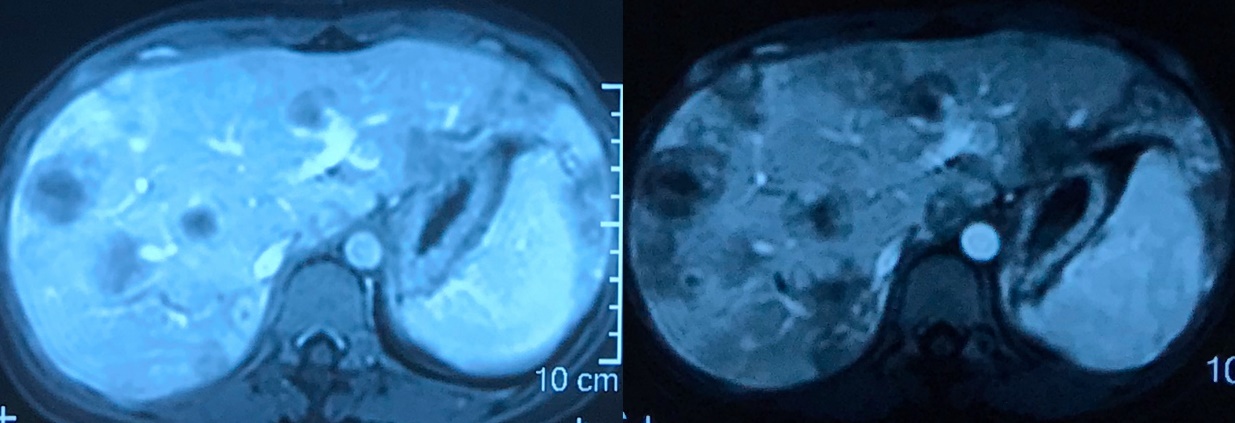 |
| 37# Progressed Disease (Progressed lesions marked with red arrows) | |
| 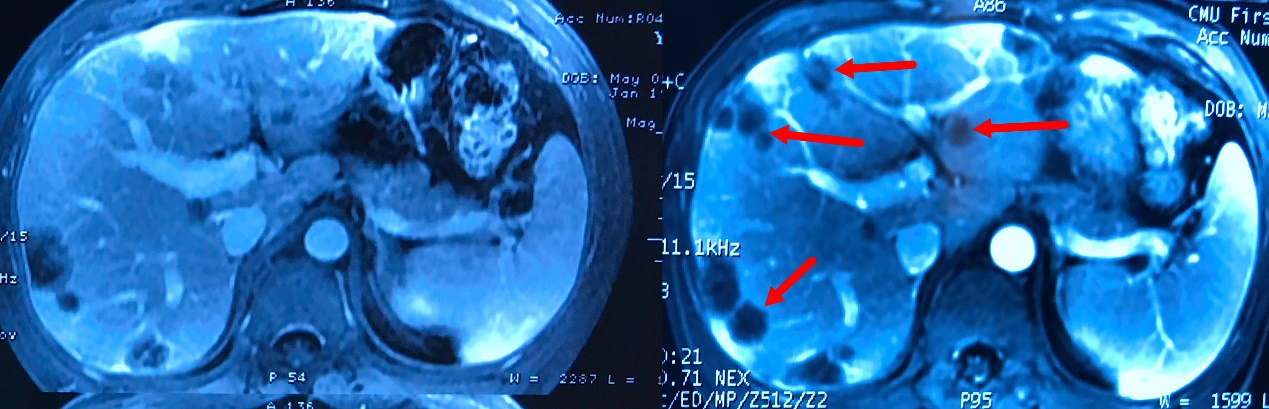 | 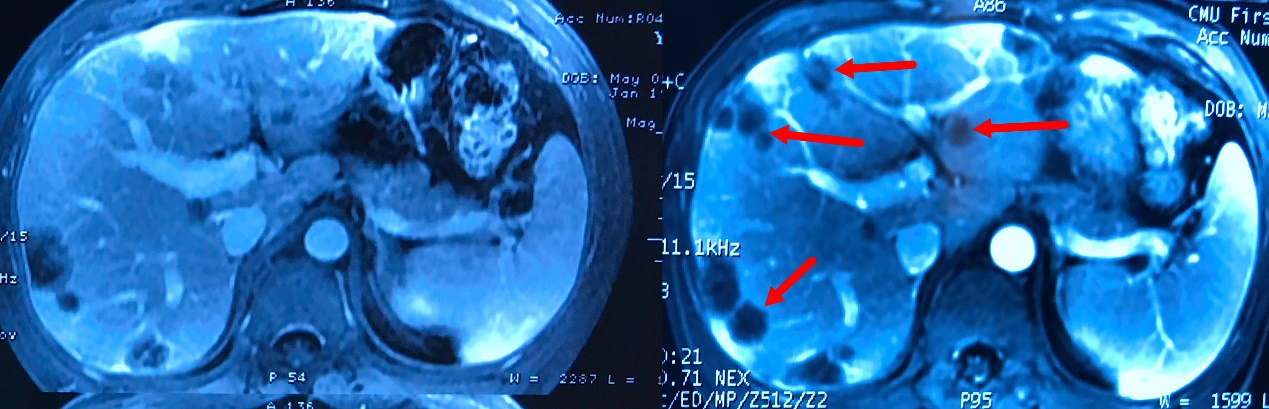 |
| 38# Progressed Disease | |
| 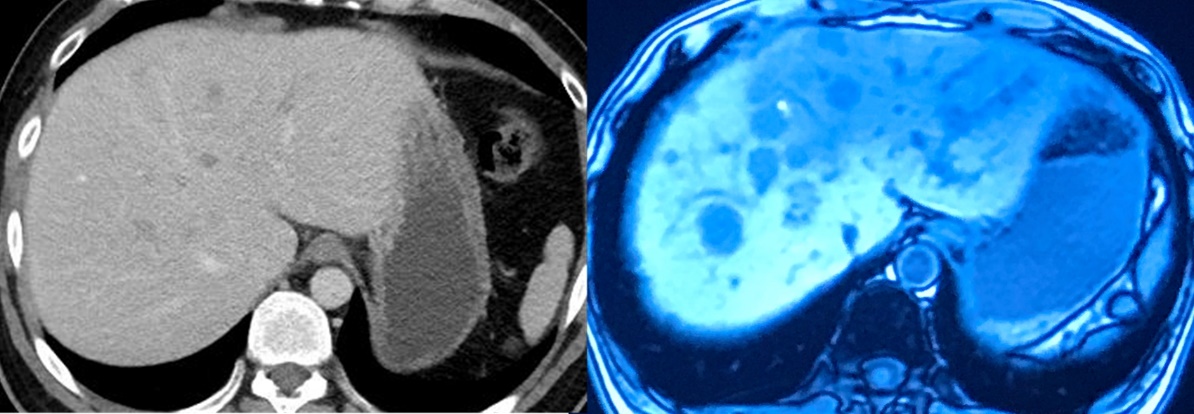 | 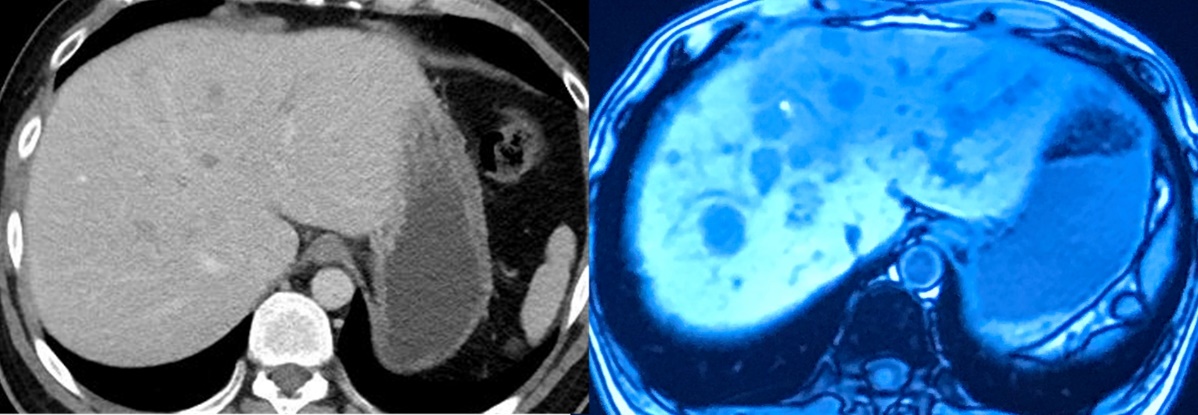 |
| 39# Progressed Disease | |
| 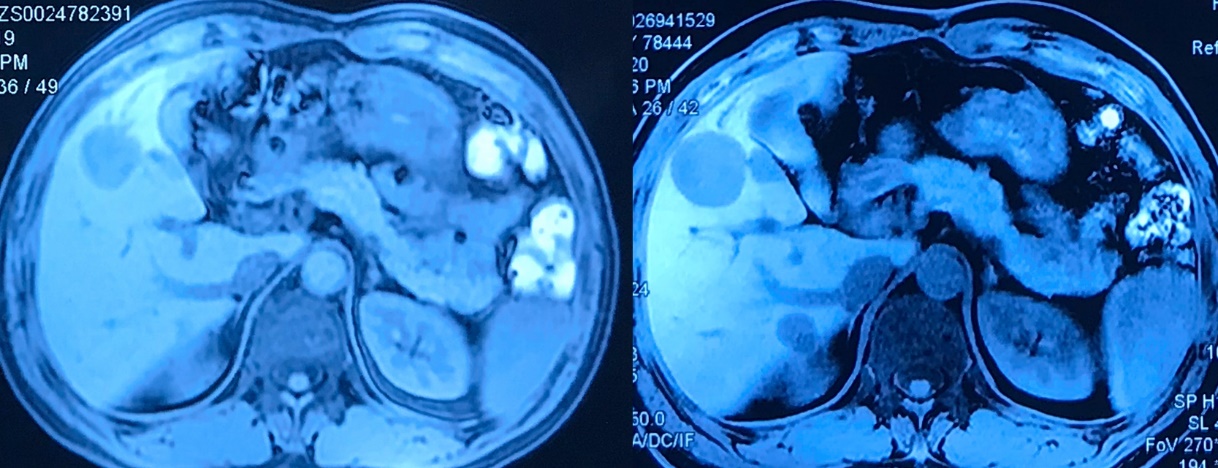 | 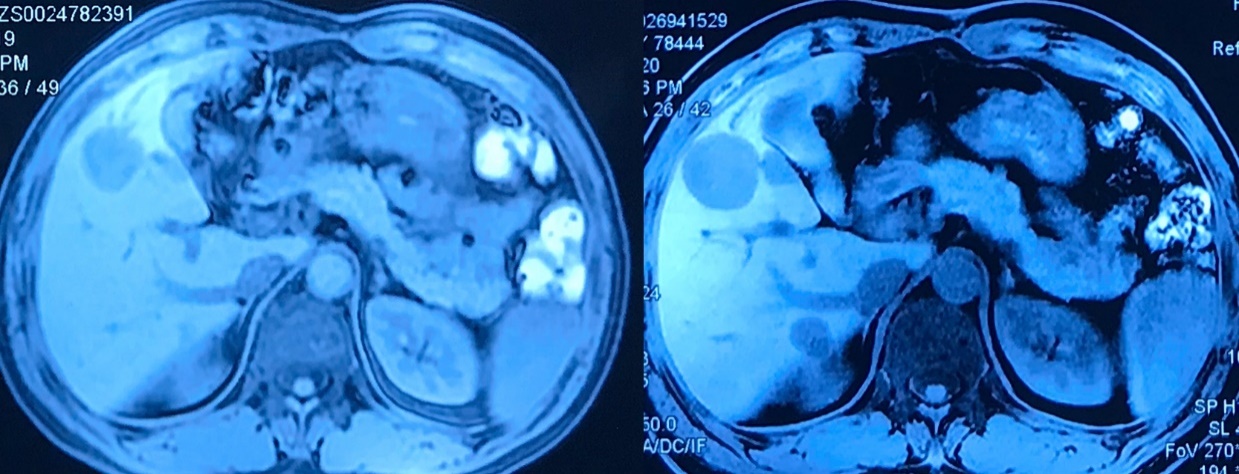 |
| 40# Progressed Disease | |
| 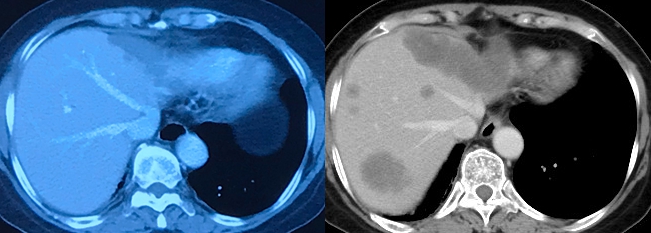 | 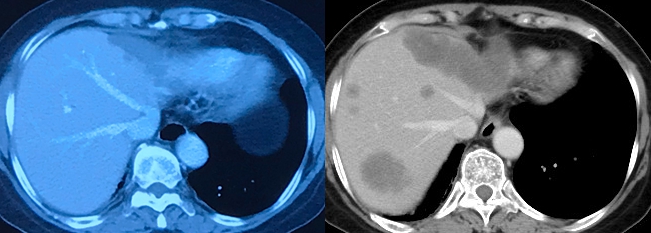 |
| 41# Progressed Disease | |
| 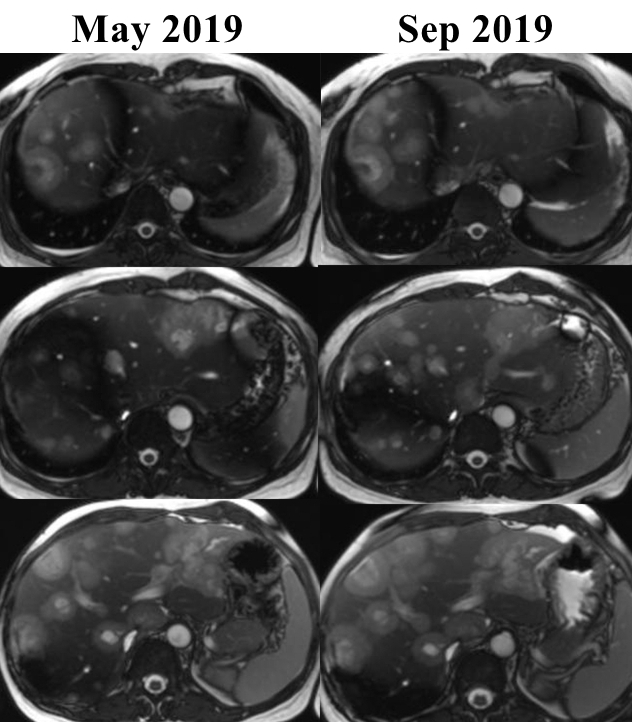 | 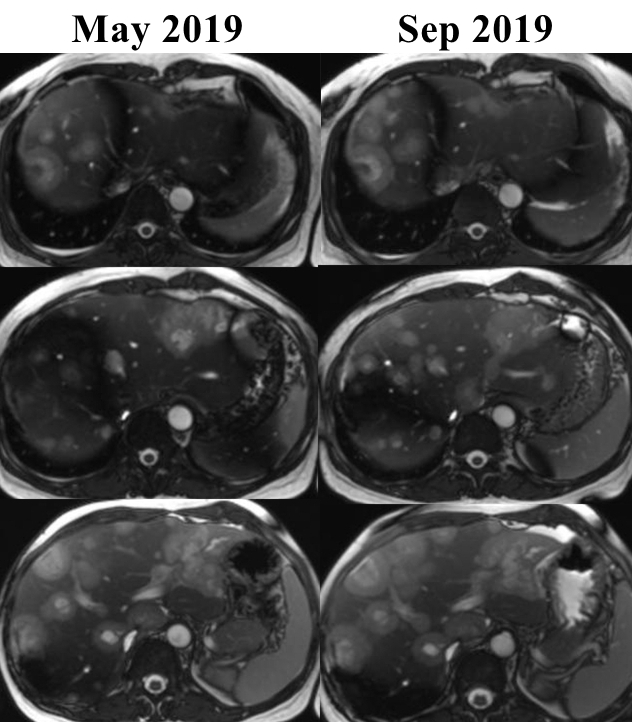 |
| 42# Progressed Disease | |
| 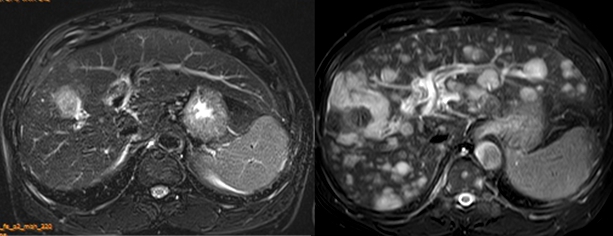 | 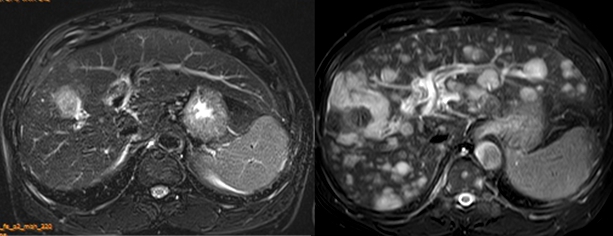 |
